# Supplementary material
Source: PubMed Central journal article supplement (PMC3246390)

## Supplementary Information

# Divergent synthetic approach to 6''-modified $\alpha$ -GalCer analogues

*Nora Pauwels, Sandrine Aspeslagh, Gerd Vanhoenacker, Koen Sandra, Esther D. Yu, Dirk Zajonc, Dirk Elewaut, Bruno Linclau, Serge Van Calenbergh*

| Index                                                                                            | Page                                                     |
|--------------------------------------------------------------------------------------------------|----------------------------------------------------------|
| Compound                                                                                         | Copies of <sup>1</sup> H and <sup>13</sup> C NMR spectra |
| <b>15</b>                                                                                        | <sup>1</sup> H.....S2                                    |
|                                                                                                  | <sup>13</sup> C.....S3                                   |
| <b>16</b>                                                                                        | <sup>1</sup> H.....S4                                    |
|                                                                                                  | <sup>13</sup> C.....S5                                   |
| <b>17</b>                                                                                        | <sup>1</sup> H.....S6                                    |
|                                                                                                  | <sup>13</sup> C.....S7                                   |
| <b>18</b>                                                                                        | <sup>1</sup> H.....S8                                    |
|                                                                                                  | <sup>13</sup> C.....S9                                   |
| <b>19</b>                                                                                        | <sup>1</sup> H.....S10                                   |
|                                                                                                  | <sup>13</sup> C.....S11                                  |
| <b>20</b>                                                                                        | <sup>1</sup> H.....S12                                   |
|                                                                                                  | <sup>13</sup> C.....S13                                  |
| <b>21</b>                                                                                        | <sup>1</sup> H.....S14                                   |
|                                                                                                  | <sup>13</sup> C.....S15                                  |
| <b>4</b>                                                                                         | <sup>1</sup> H.....S16                                   |
|                                                                                                  | <sup>13</sup> C.....S17                                  |
| <b>12</b>                                                                                        | <sup>1</sup> H.....S18                                   |
|                                                                                                  | <sup>13</sup> C.....S19                                  |
| <b>13</b>                                                                                        | <sup>1</sup> H.....S20                                   |
|                                                                                                  | <sup>13</sup> C.....S21                                  |
| <b>14</b>                                                                                        | <sup>1</sup> H.....S22                                   |
|                                                                                                  | <sup>13</sup> C.....S23                                  |
| Copy of chromatograms of final compounds <b>4</b> , <b>12</b> , <b>13</b> and <b>14</b> .....S24 |                                                          |

SAMPLE: NP002

File: /home/data/Nora/NP002/Proton\_12Oct2009\_1.fid

Date: Oct 12 2009

Solvent: dms

Temp. 25.0 C / 298.1 K

Operator: Nora

File: Proton\_12Oct2009\_1

Mercury-300BB "linux300"

PULSE SEQUENCE: Proton

Relax. delay 2.000 sec

Pulse 45.0 degrees

Acq. time 3.000 sec

Width 4798.5 Hz

64 repetitions

Total time 3 min, 21 s

OBSERVE H1, 300.0113666 MHz

DATA PROCESSING

Line broadening 0.2 Hz

FT size 32768

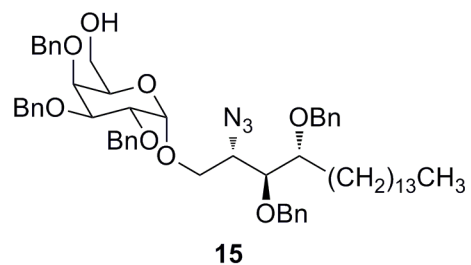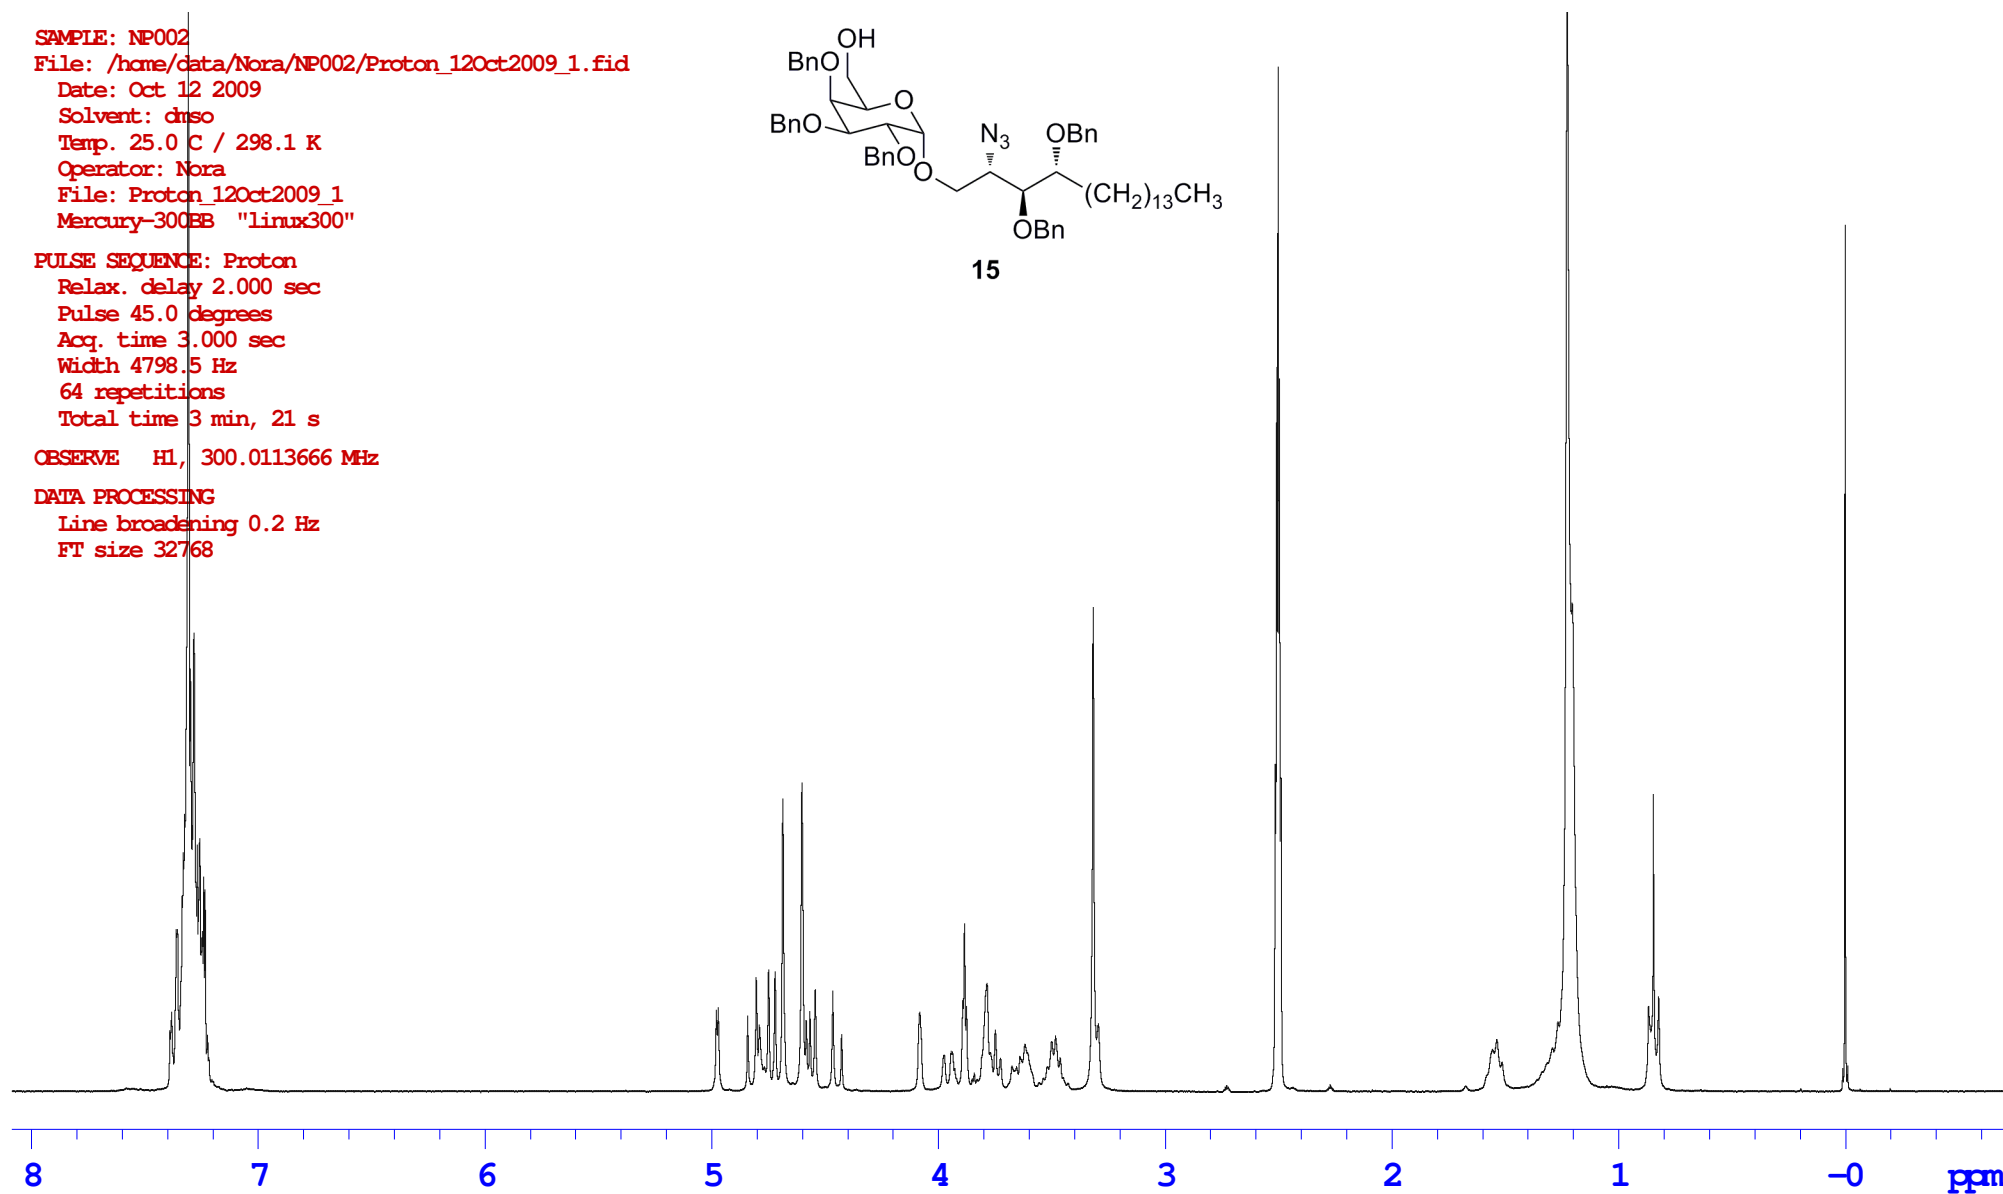

SAMPLE: NP002

File: /home/data/Nora/NP002/Carbon\_12h\_07Oct2009\_1.fid

Date: Oct 7 2009

Solvent: dms

Temp. 25.0 C / 298.1 K

Operator: Nora

File: Carbon\_12h\_07Oct2009\_1

Mercury-300EB "linux300"

PULSE SEQUENCE: Carbon\_12h

Relax. delay 1.000 sec

Pulse 45.0 degrees

Acq. time 2.000 sec

Width 18115.9 Hz

14400 repetitions

Total time 12 hr, 37 min, 36 s

OBSERVE C13, 75.4379015 MHz

DECOUPLE H1, 300.0128784 MHz

Power 33 dB

continuously on

WALTZ-16 modulated

DATA PROCESSING

Line broadening 0.5 Hz

FT size 131072

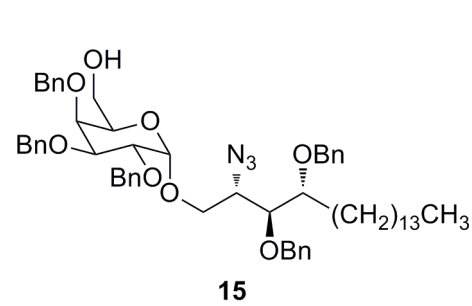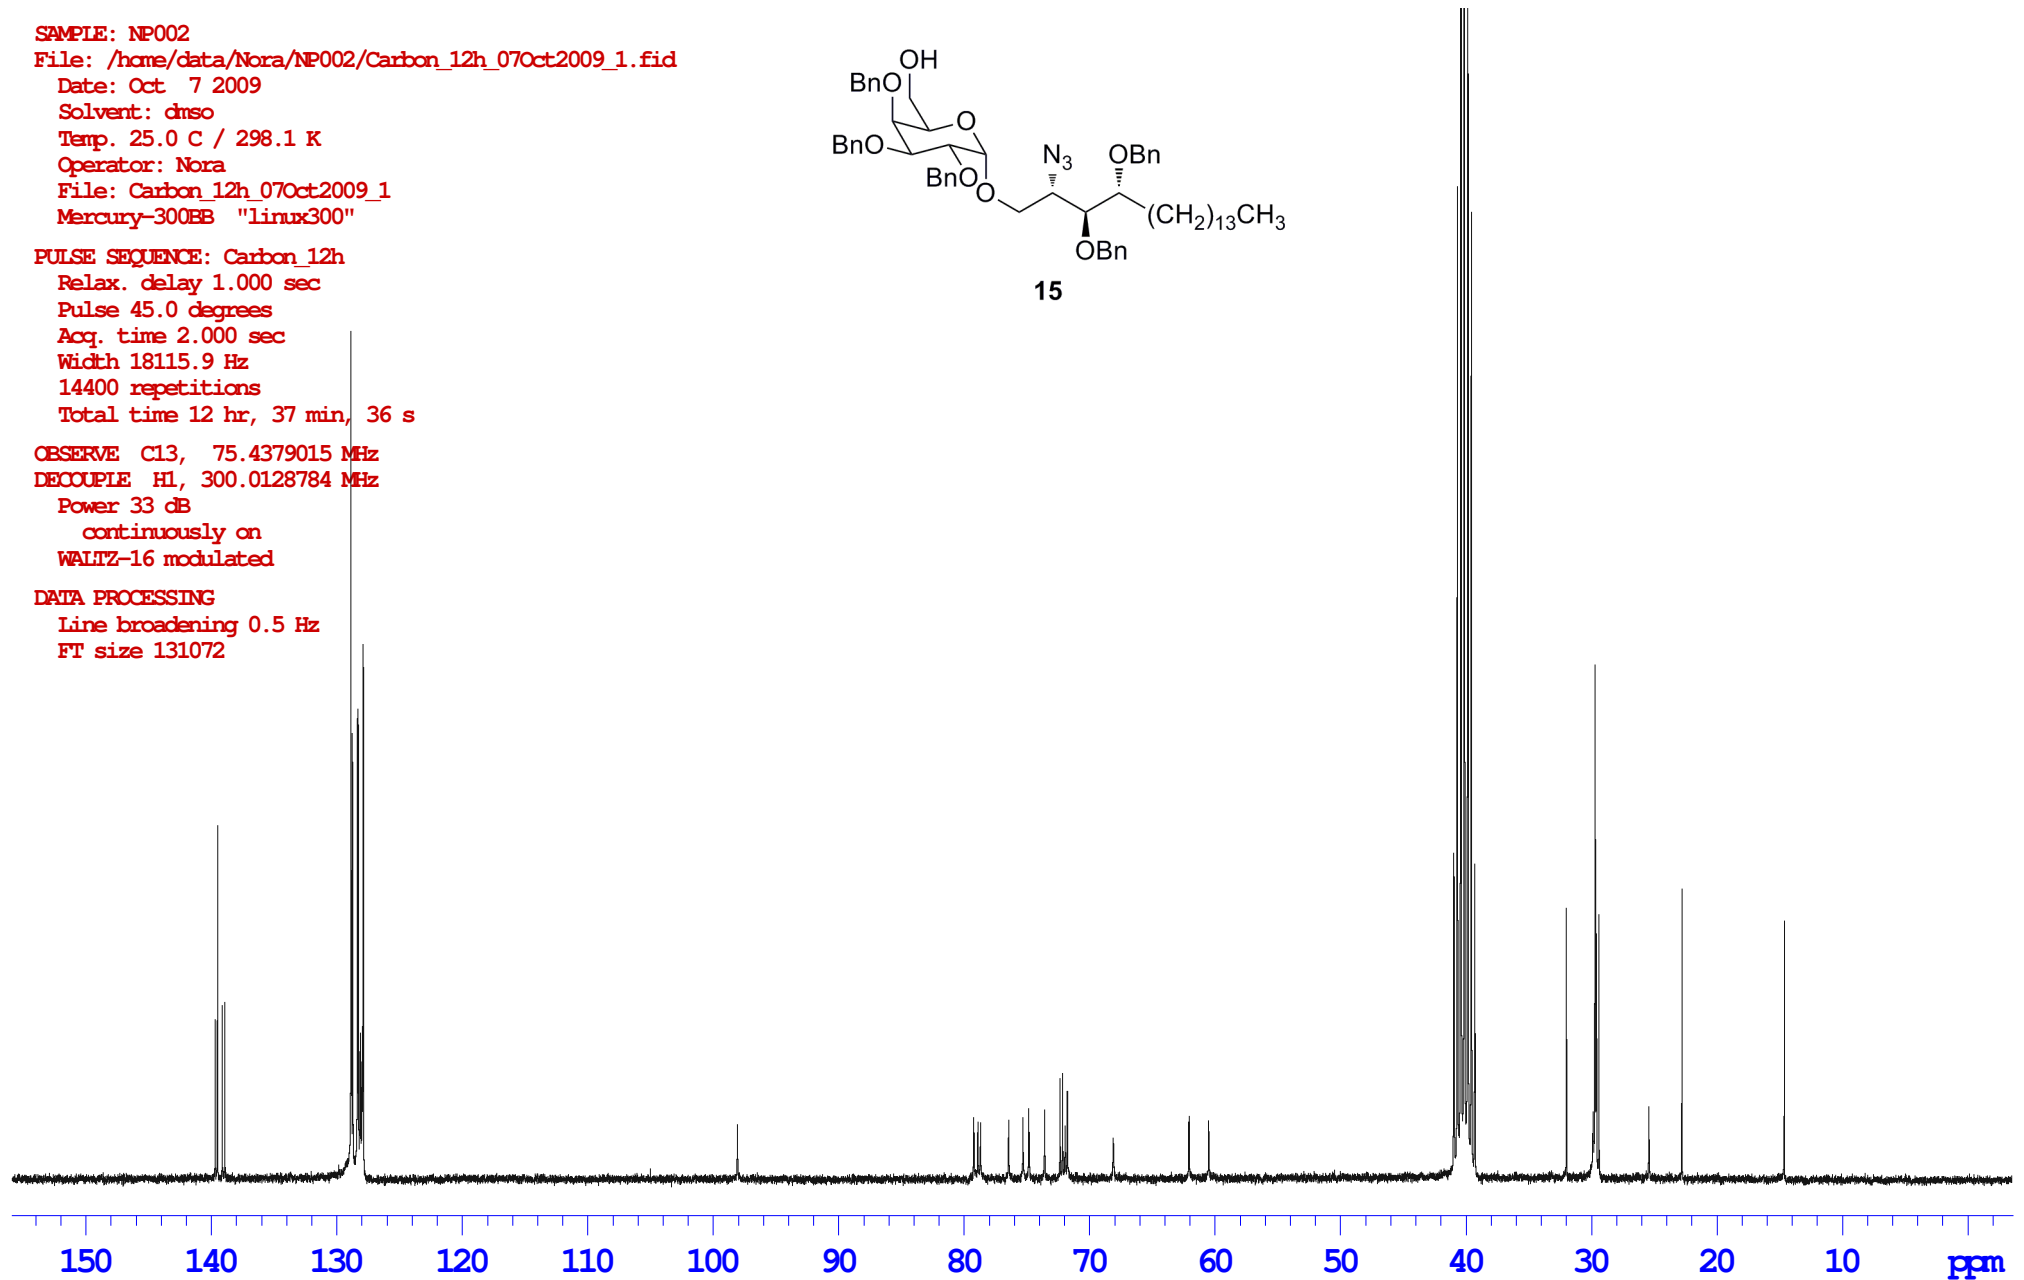

SAMPLE: NP222

File: /home/data/Nora/NP222/Proton\_Minsw\_19Jan2009\_1.fid

Date: Jan 19 2009

Solvent: cdc13

Temp. 25.0 C / 298.1 K

Operator: Nora

File: Proton\_Minsw\_19Jan2009\_1

Mercury-300EB "linux300"

PULSE SEQUENCE: Proton\_Minsw

Relax. delay 2.000 sec

Pulse 45.0 degrees

Acq. time 3.004 sec

Width 2540.7 Hz

64 repetitions

Total time 3 min, 18 s

OBSERVE H1, 300.0099471 MHz

DATA PROCESSING

Line broadening 0.2 Hz

FT size 16384

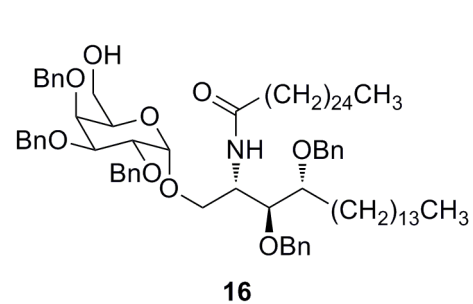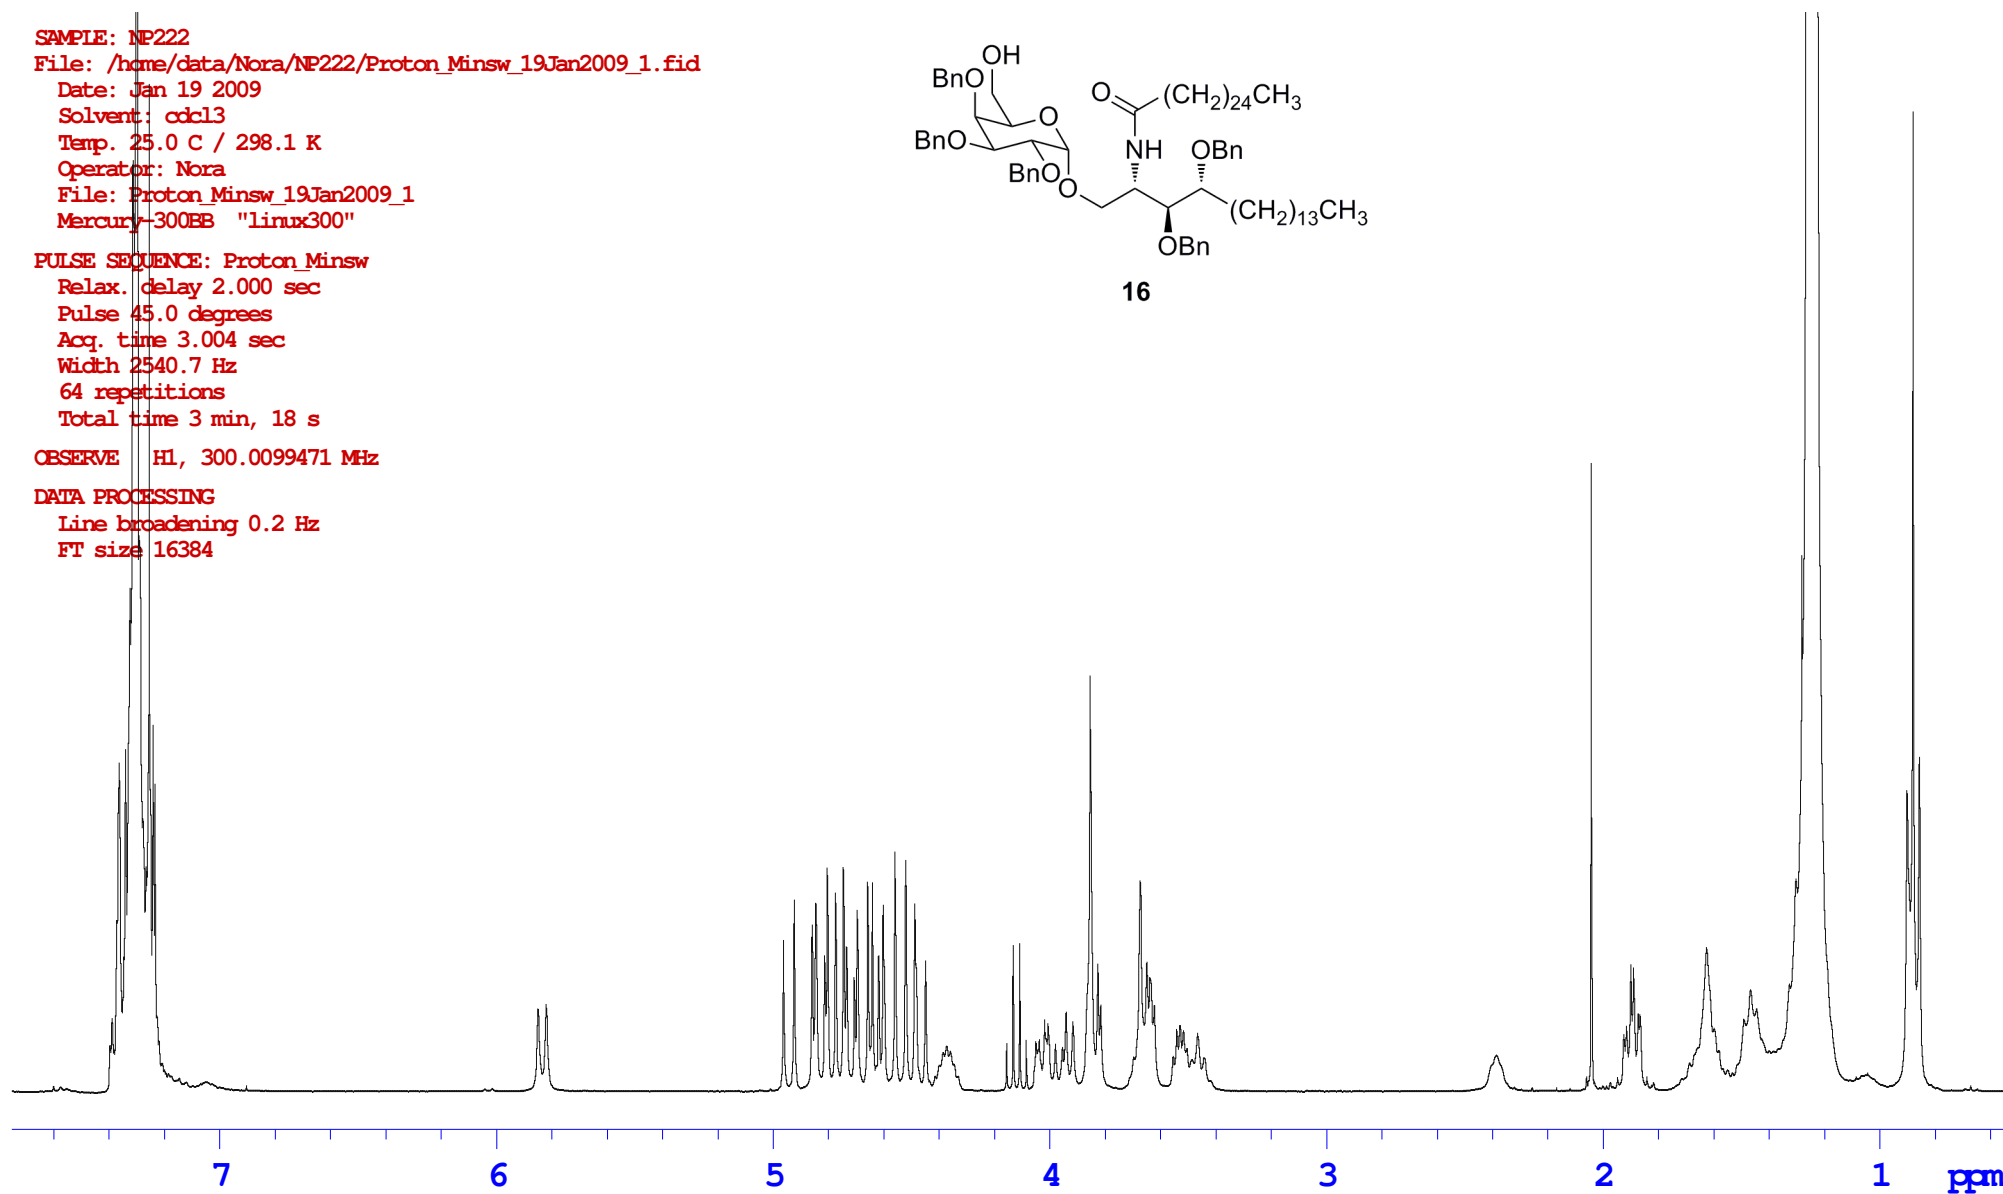

SAMPLE: NP222

File: /home/data/Nora/NP222/Carbon\_12h\_19Jan2009\_1.fid

Date: Jan 19 2009

Solvent: cdc13

Temp. 25.0 C / 298.1 K

Operator: Nora

File: Carbon\_12h\_19Jan2009\_1

Mercury-300EB "linux300"

PULSE SEQUENCE: Carbon\_12h

Relax. delay 1.000 sec

Pulse 45.0 degrees

Acq. time 2.000 sec

Width 18115.9 Hz

14400 repetitions

Total time 12 hr, 37 min, 36 s

OBSERVE C13, 75.4375432 MHz

DECOUPLE H1, 300.0114533 MHz

Power 33 dB

continuously on

WALTZ-16 modulated

DATA PROCESSING

Line broadening 0.5 Hz

FT size 131072

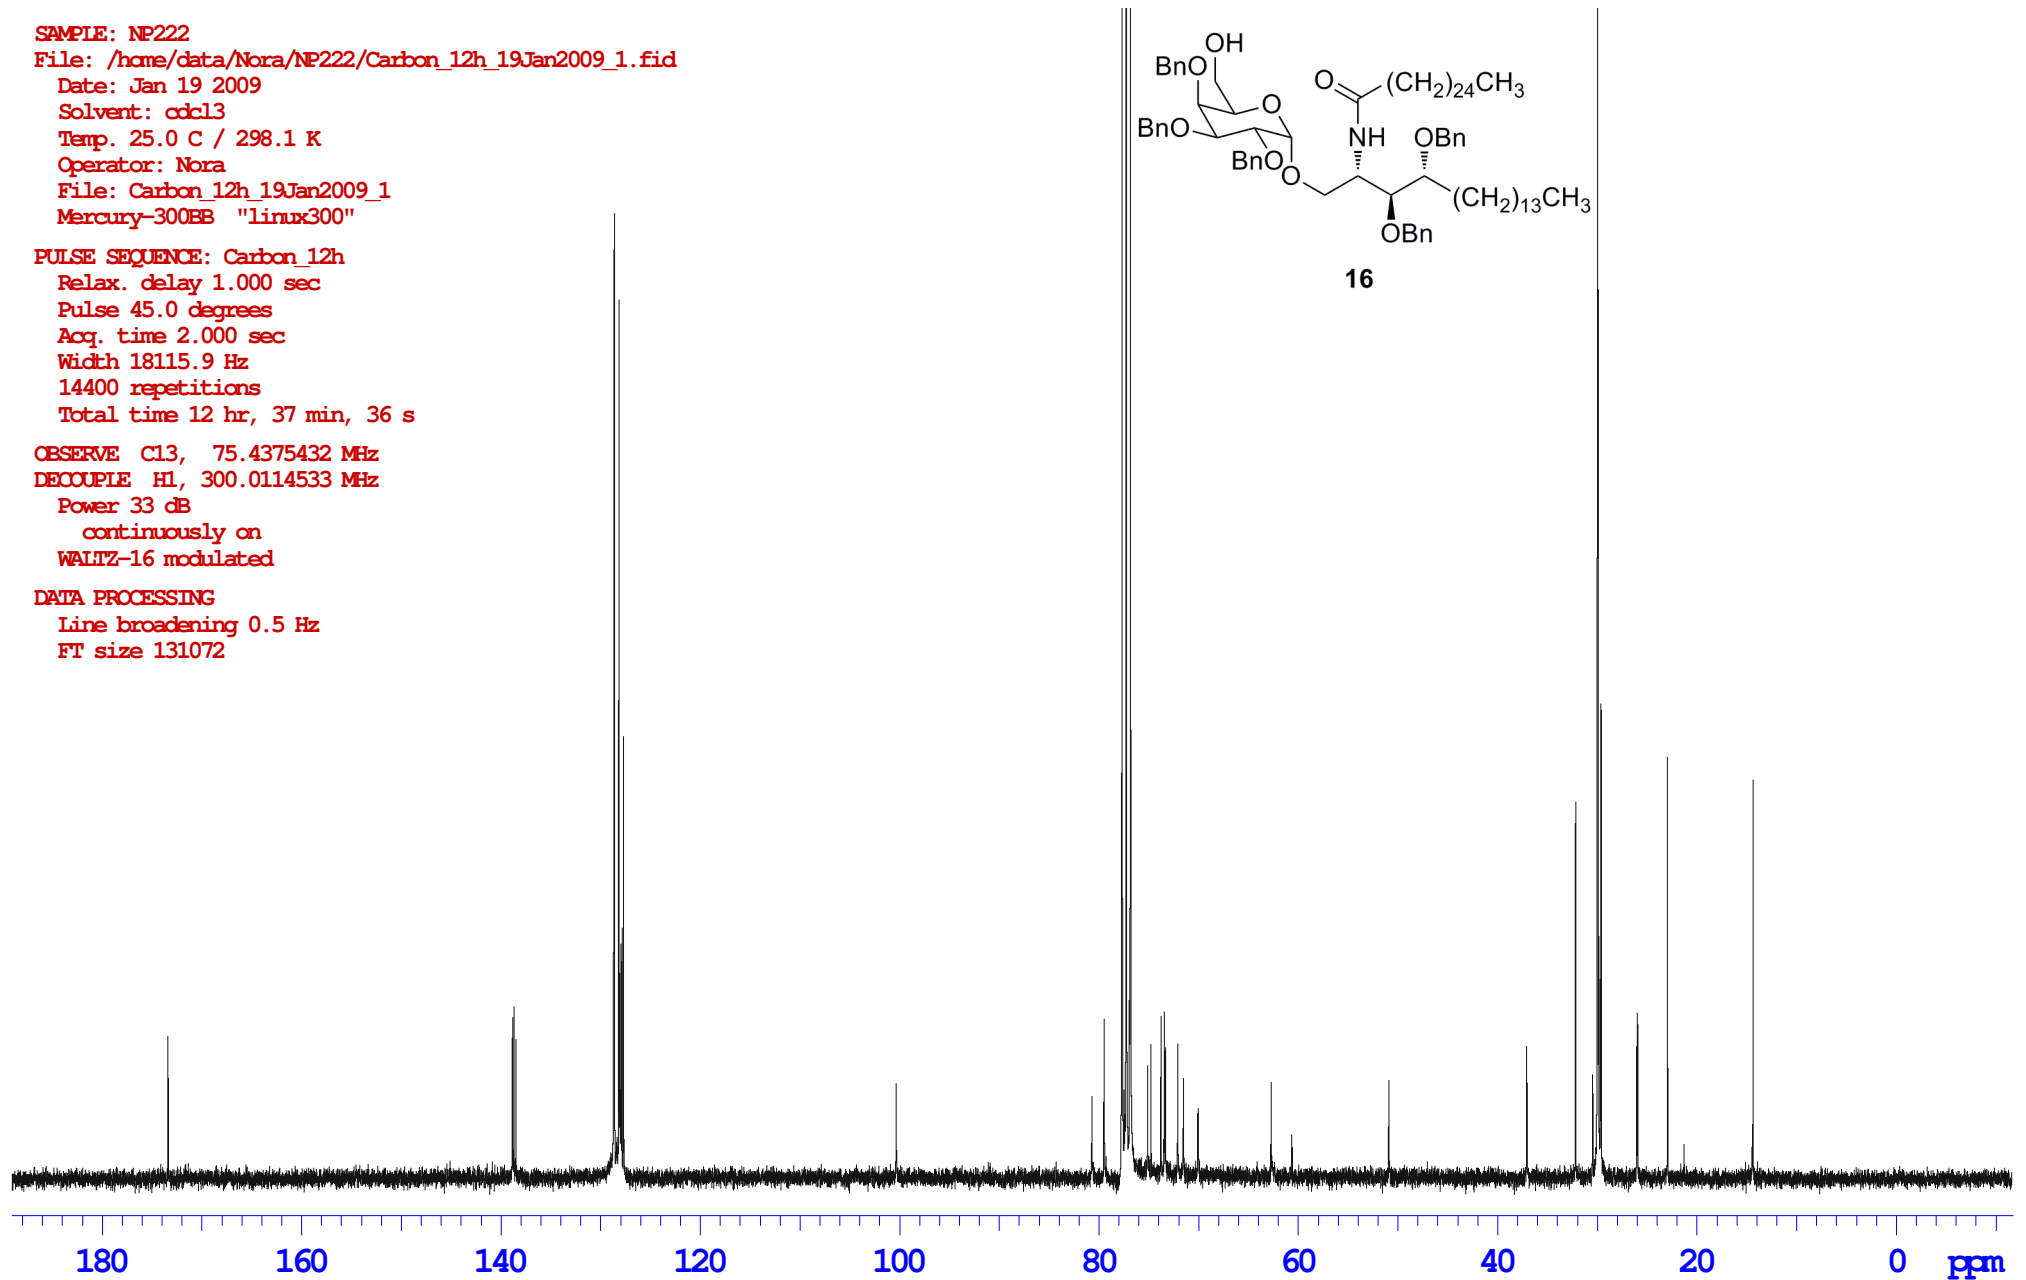

SAMPLE: NP004

File: /home/data/Nora/NP004/Proton\_Minsw\_14Oct2009\_1.fid

Date: Oct 14 2009

Solvent: cdcl3

Temp. 25.0 C / 298.1 K

Operator: Nora

File: Proton\_Minsw\_14Oct2009\_1

Mercury-300EB "linux300"

PULSE SEQUENCE: Proton\_Minsw

Relax. delay 2.000 sec

Pulse 45.0 degrees

Acq. time 3.003 sec

Width 2525.3 Hz

32 repetitions

Total time 1 min, 39 s

OBSERVE H1, 300.0099471 MHz

DATA PROCESSING

Line broadening 0.2 Hz

FT size 16384

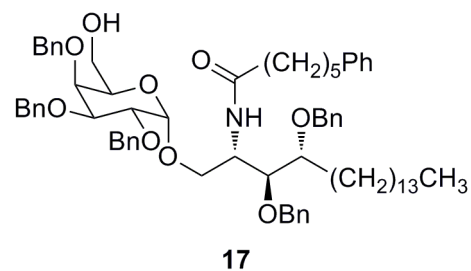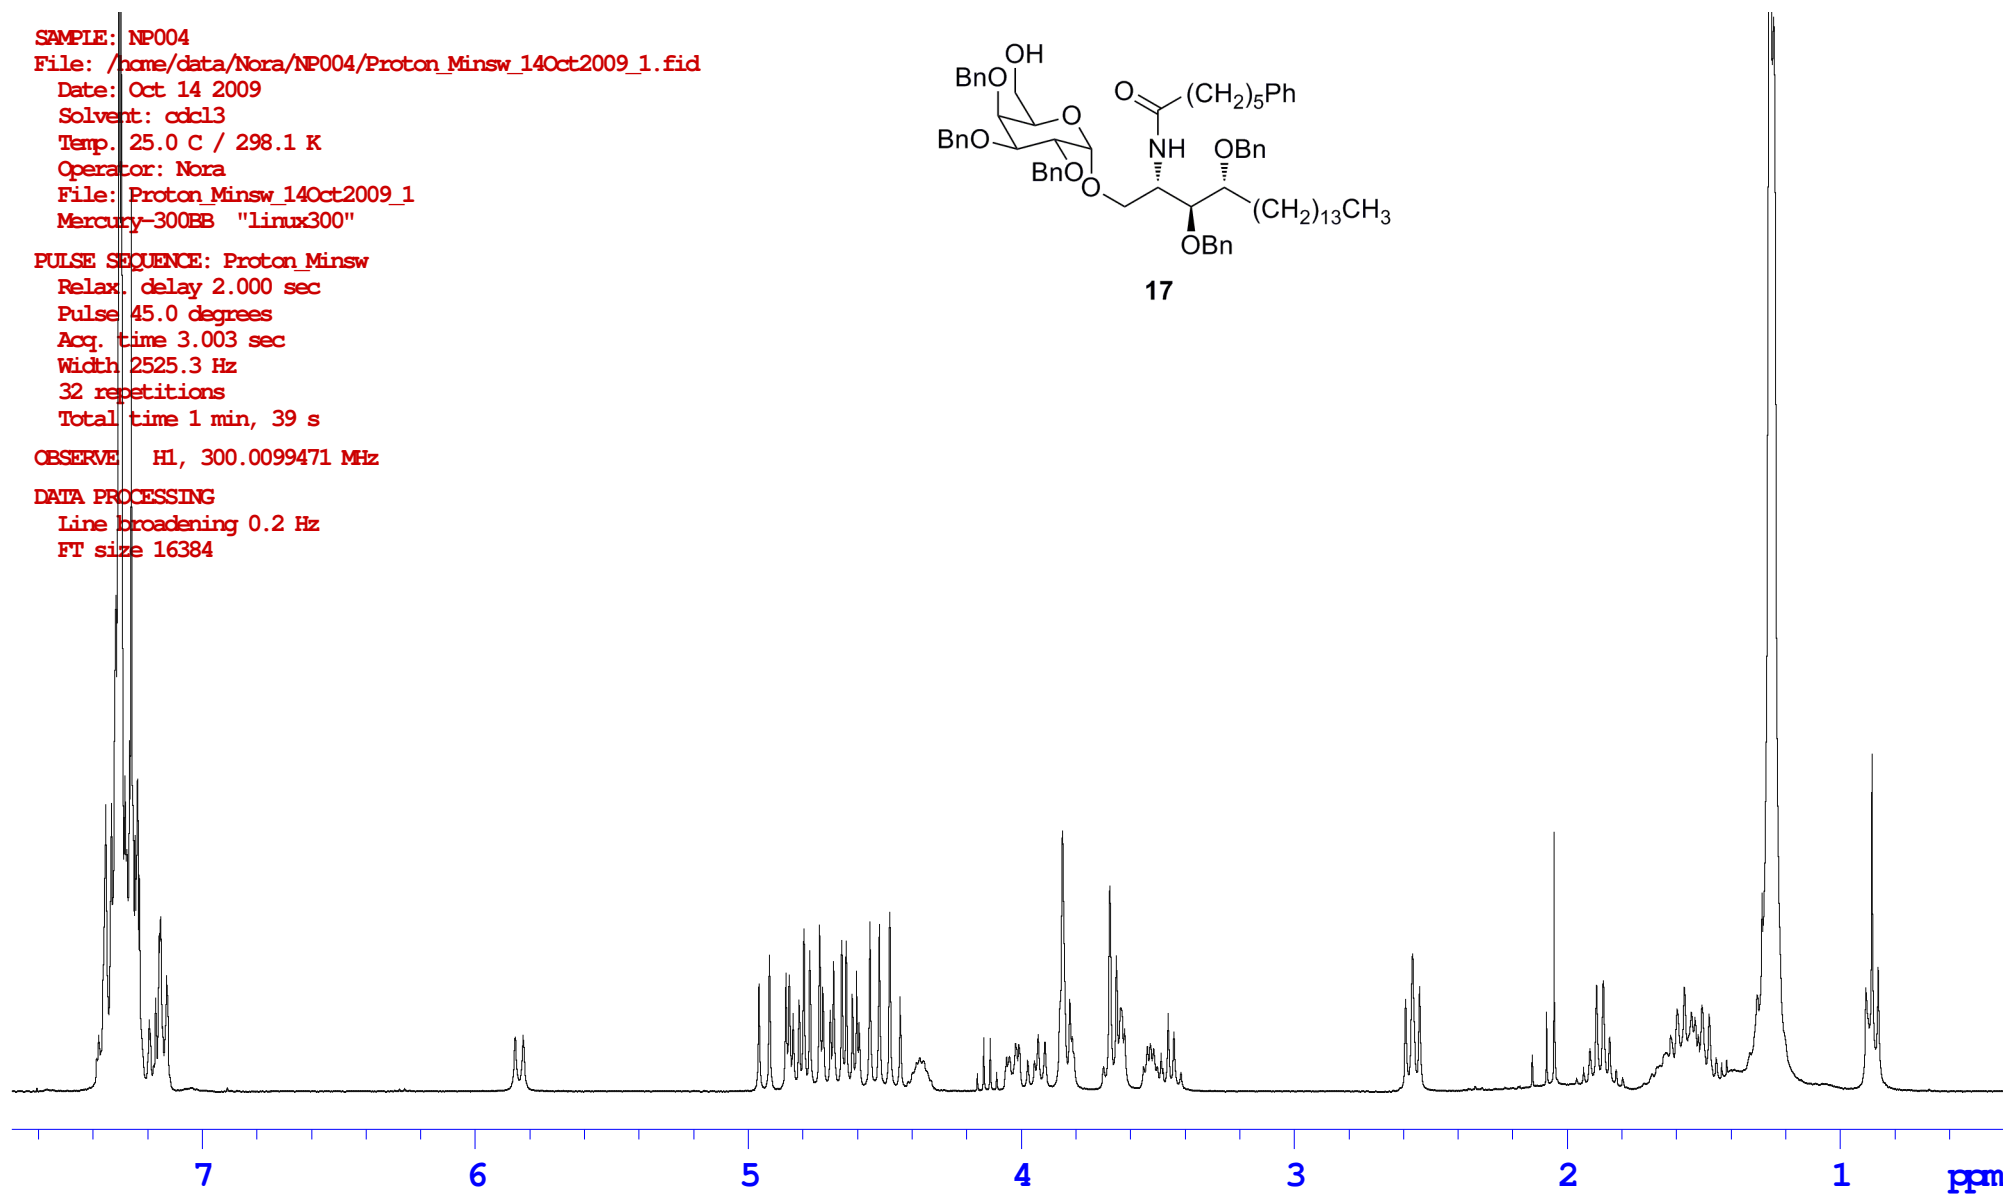

SAMPLE: NP004

File: /home/data/Nora/NP004/Carbon\_14Oct2009\_1.fid

Date: Oct 14 2009

Solvent: cdc13

Temp. 25.0 C / 298.1 K

Operator: Nora

File: Carbon\_14Oct2009\_1

Mercury-300EB "linux300"

PULSE SEQUENCE: Carbon

Relax. delay 1.000 sec

Pulse 40.2 degrees

Acq. time 2.000 sec

Width 18115.9 Hz

11000 repetitions

Total time 9 hr, 38 min, 46 s

OBSERVE C13, 75.4375432 MHz

DECOUPLE H1, 300.0114533 MHz

Power 33 dB

continuously on

WALTZ-16 modulated

DATA PROCESSING

Line broadening 0.5 Hz

FT size 131072

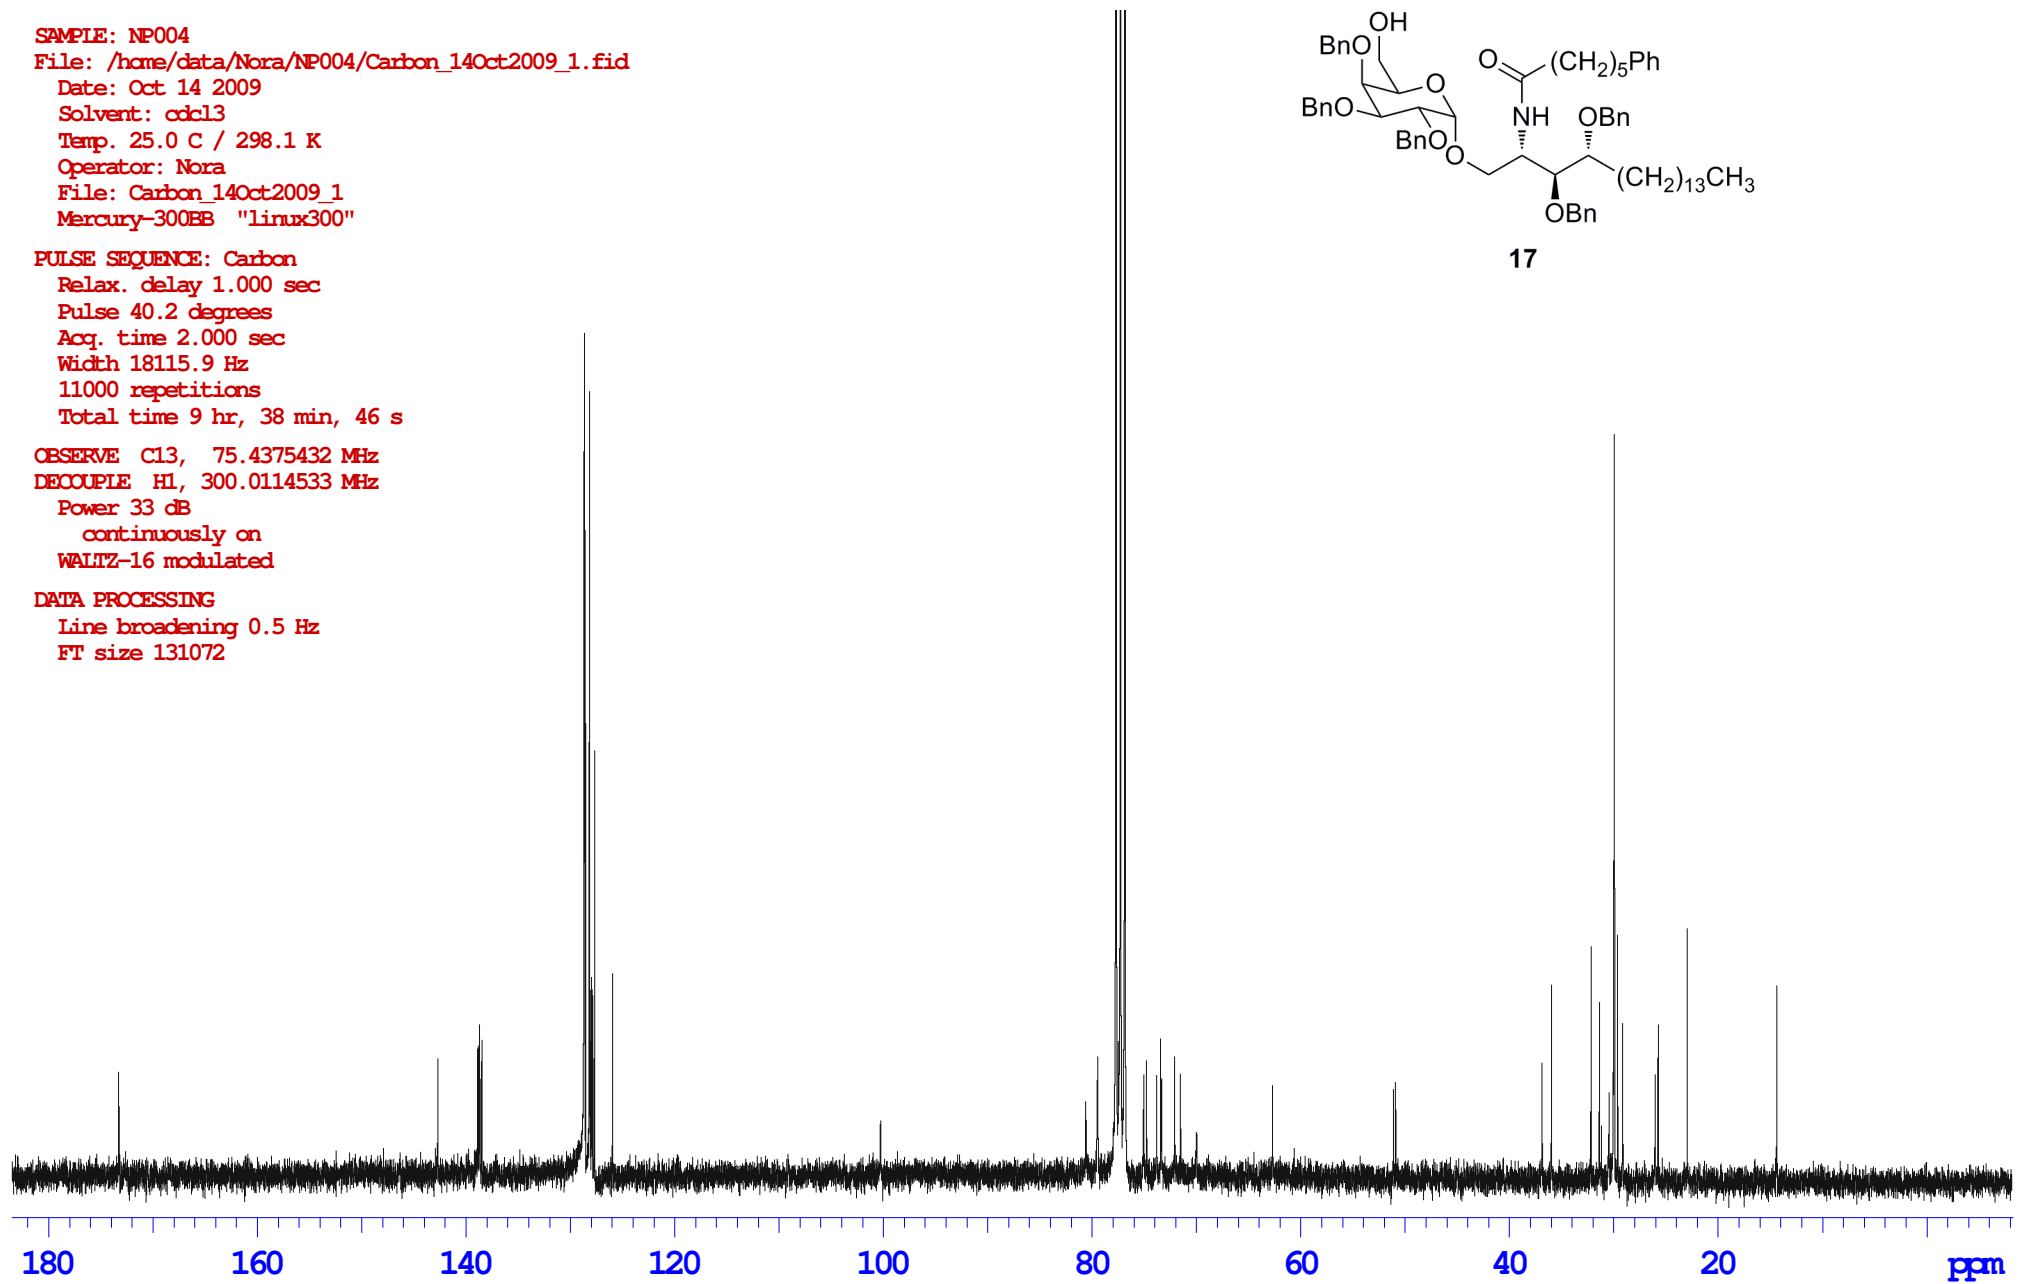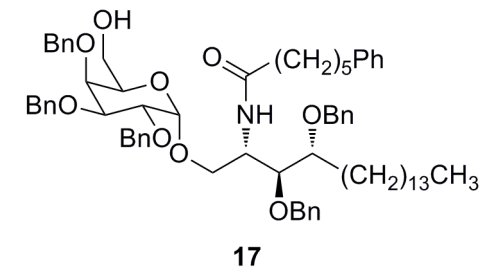

SAMPLE: NP009  
File: /home/data/Nora/NP009/Proton\_Minsw\_15Nov2009\_1.fid  
Date: Nov 15 2009  
Solvent: cdc13  
Temp.: 25.0 C / 298.1 K  
Operator: Nora  
File: Proton\_Minsw\_15Nov2009\_1  
Mercury-300EB "linux300"

PULSE SEQUENCE: Proton\_Minsw  
Relax. delay 2.000 sec  
Pulse 45.0 degrees  
Acq. time 3.002 sec  
Width 2812.1 Hz  
32 repetitions  
Total time 1 min, 39 s

OBSERVE H1, 300.0099471 MHz

DATA PROCESSING  
Line broadening 0.2 Hz  
FT size 32768

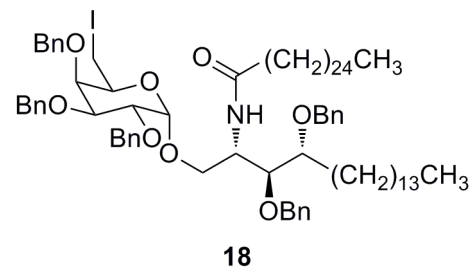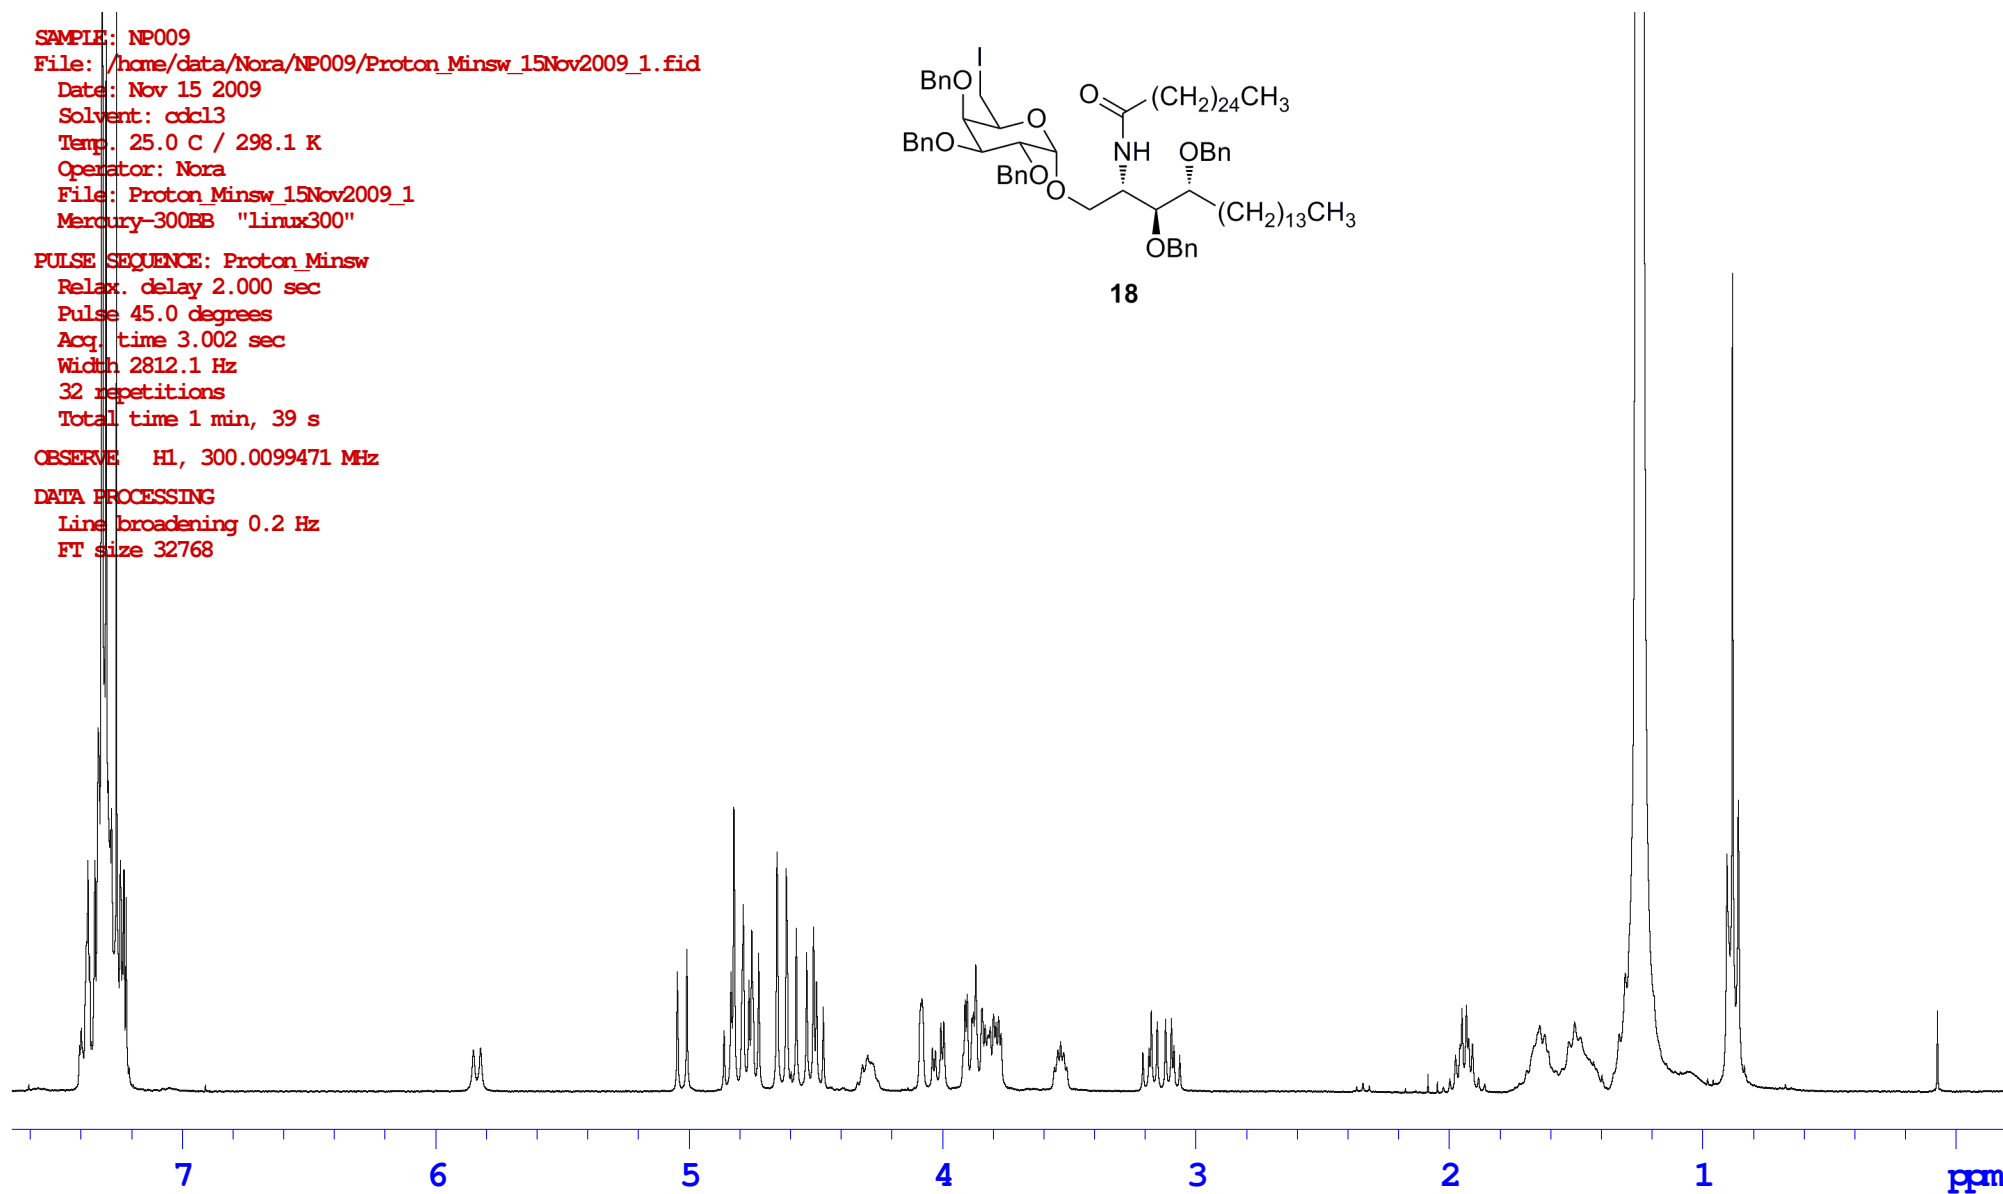



SAMPLE: NP009  
File: /home/data/Nora/NP009/Carbon\_12h\_15Nov2009\_1.fid  
Date: Nov 15 2009  
Solvent: cdc13  
Temp. 25.0 C / 298.1 K  
Operator: Nora  
File: Carbon\_12h\_15Nov2009\_1  
Mercury-300EB "linux300"

PULSE SEQUENCE: Carbon\_12h  
Relax. delay 1.000 sec  
Pulse 45.0 degrees  
Acq. time 2.000 sec  
Width 18115.9 Hz  
17000 repetitions  
Total time 14 hr, 54 min, 21 s

OBSERVE C13, 75.4378240 MHz  
DECOUPLE H1, 300.0114533 MHz  
Power 33 dB  
continuously on  
WALTZ-16 modulated

DATA PROCESSING  
Line broadening 0.5 Hz  
FT size 131072

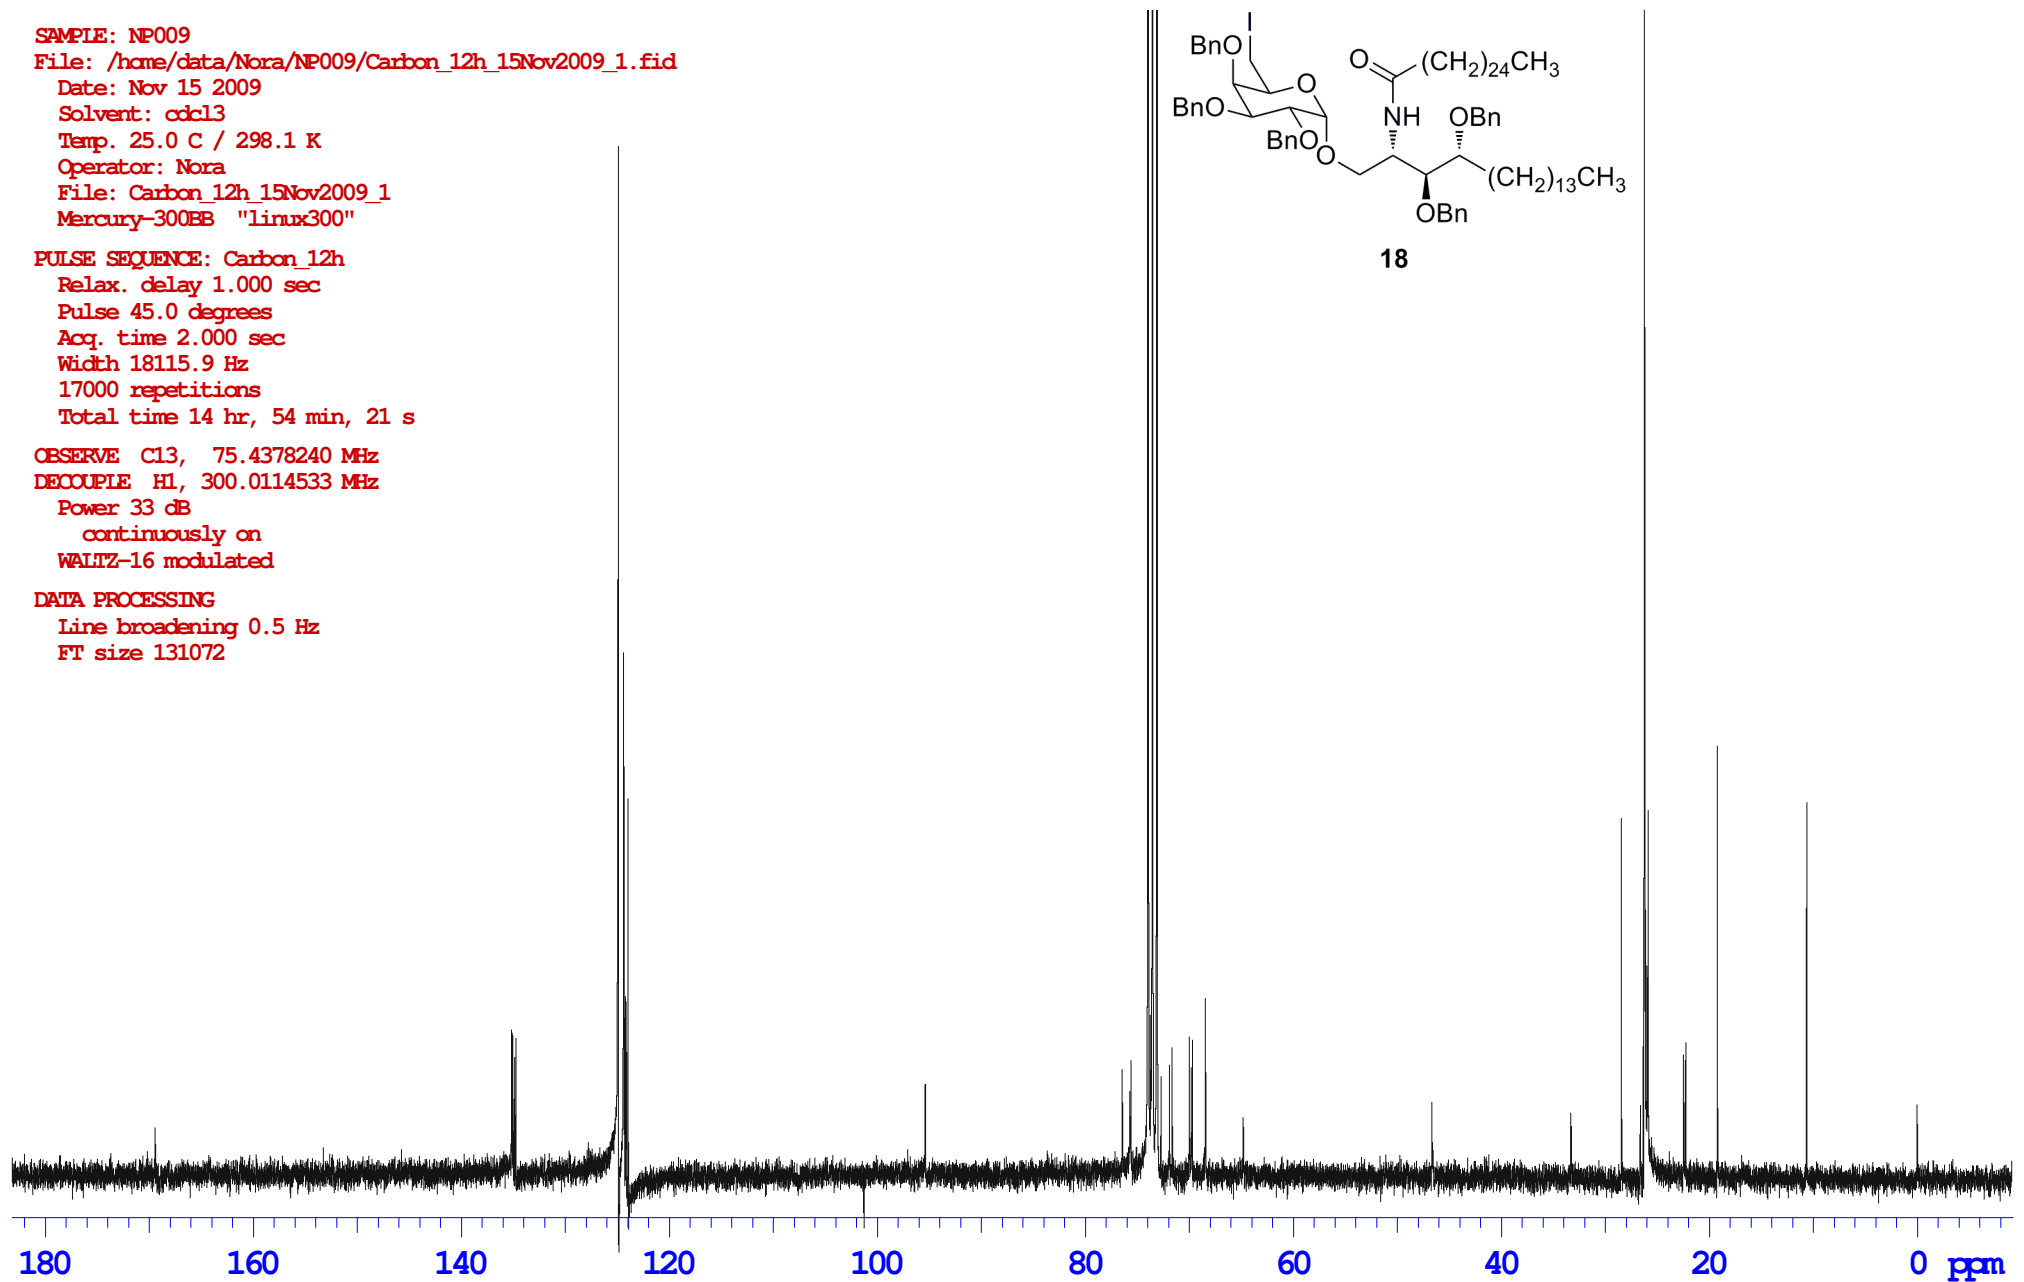

SAMPLE: NP007

File: /home/data/Nora/NP007/Proton\_Minsw\_27Oct2009\_2.fid

Date: Oct 27 2009

Solvent: cdc13

Temp. 25.0 C / 298.1 K

Operator: Nora

File: Proton\_Minsw\_27Oct2009\_2

Mercury-300EB "linux300"

PULSE SEQUENCE: Proton\_Minsw

Relax. delay 2.000 sec

Pulse 45.0 degrees

Acq. time 3.002 sec

Width 2812.1 Hz

32 repetitions

Total time 1 min, 39 s

OBSERVE H1, 300.0099471 MHz

DATA PROCESSING

Line broadening 0.2 Hz

FT size 32768

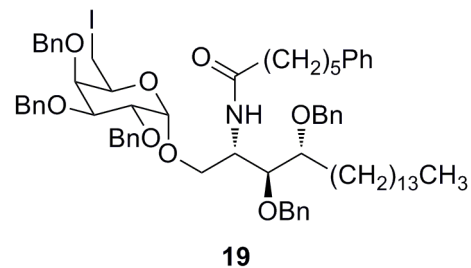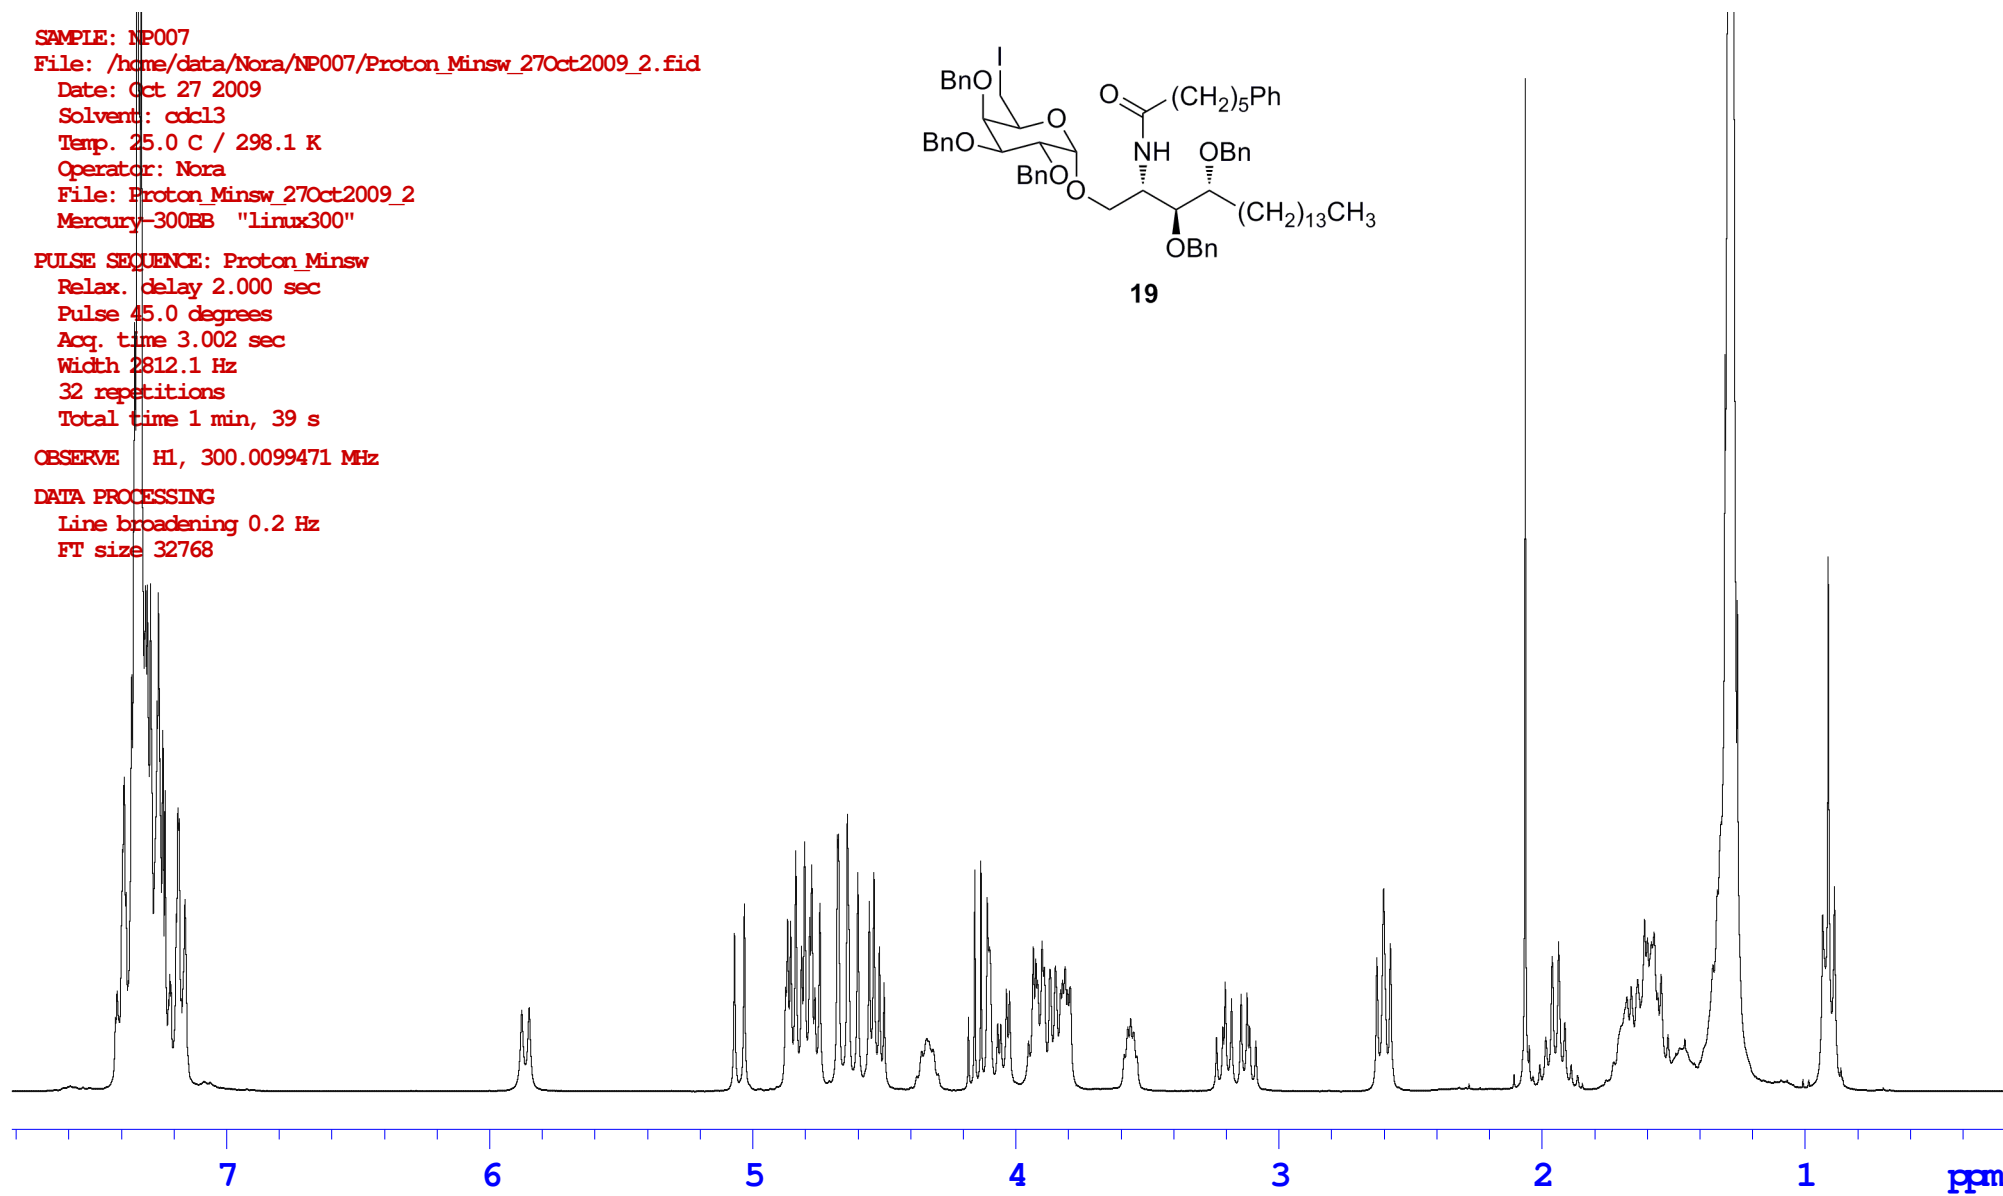

SAMPLE: NP007

File: /home/data/Nora/NP007/Carbon\_27Oct2009\_1.fid

Date: Oct 27 2009

Solvent: cdc13

Temp. 25.0 C / 298.1 K

Operator: Nora

File: Carbon\_27Oct2009\_1

Mercury-300EB "linux300"

PULSE SEQUENCE: Carbon

Relax. delay 1.000 sec

Pulse 40.2 degrees

Acq. time 2.000 sec

Width 18115.9 Hz

1100 repetitions

Total time 58 min, 4 s

OBSERVE C13, 75.4378278 MHz

DECOUPLE H1, 300.0114533 MHz

Power 33 dB

continuously on

WALTZ-16 modulated

DATA PROCESSING

Line broadening 0.5 Hz

FT size 131072

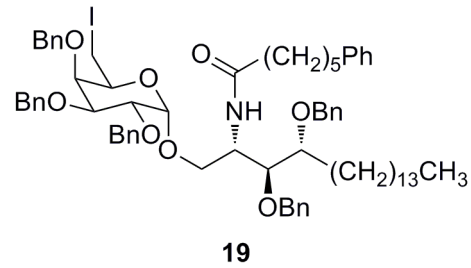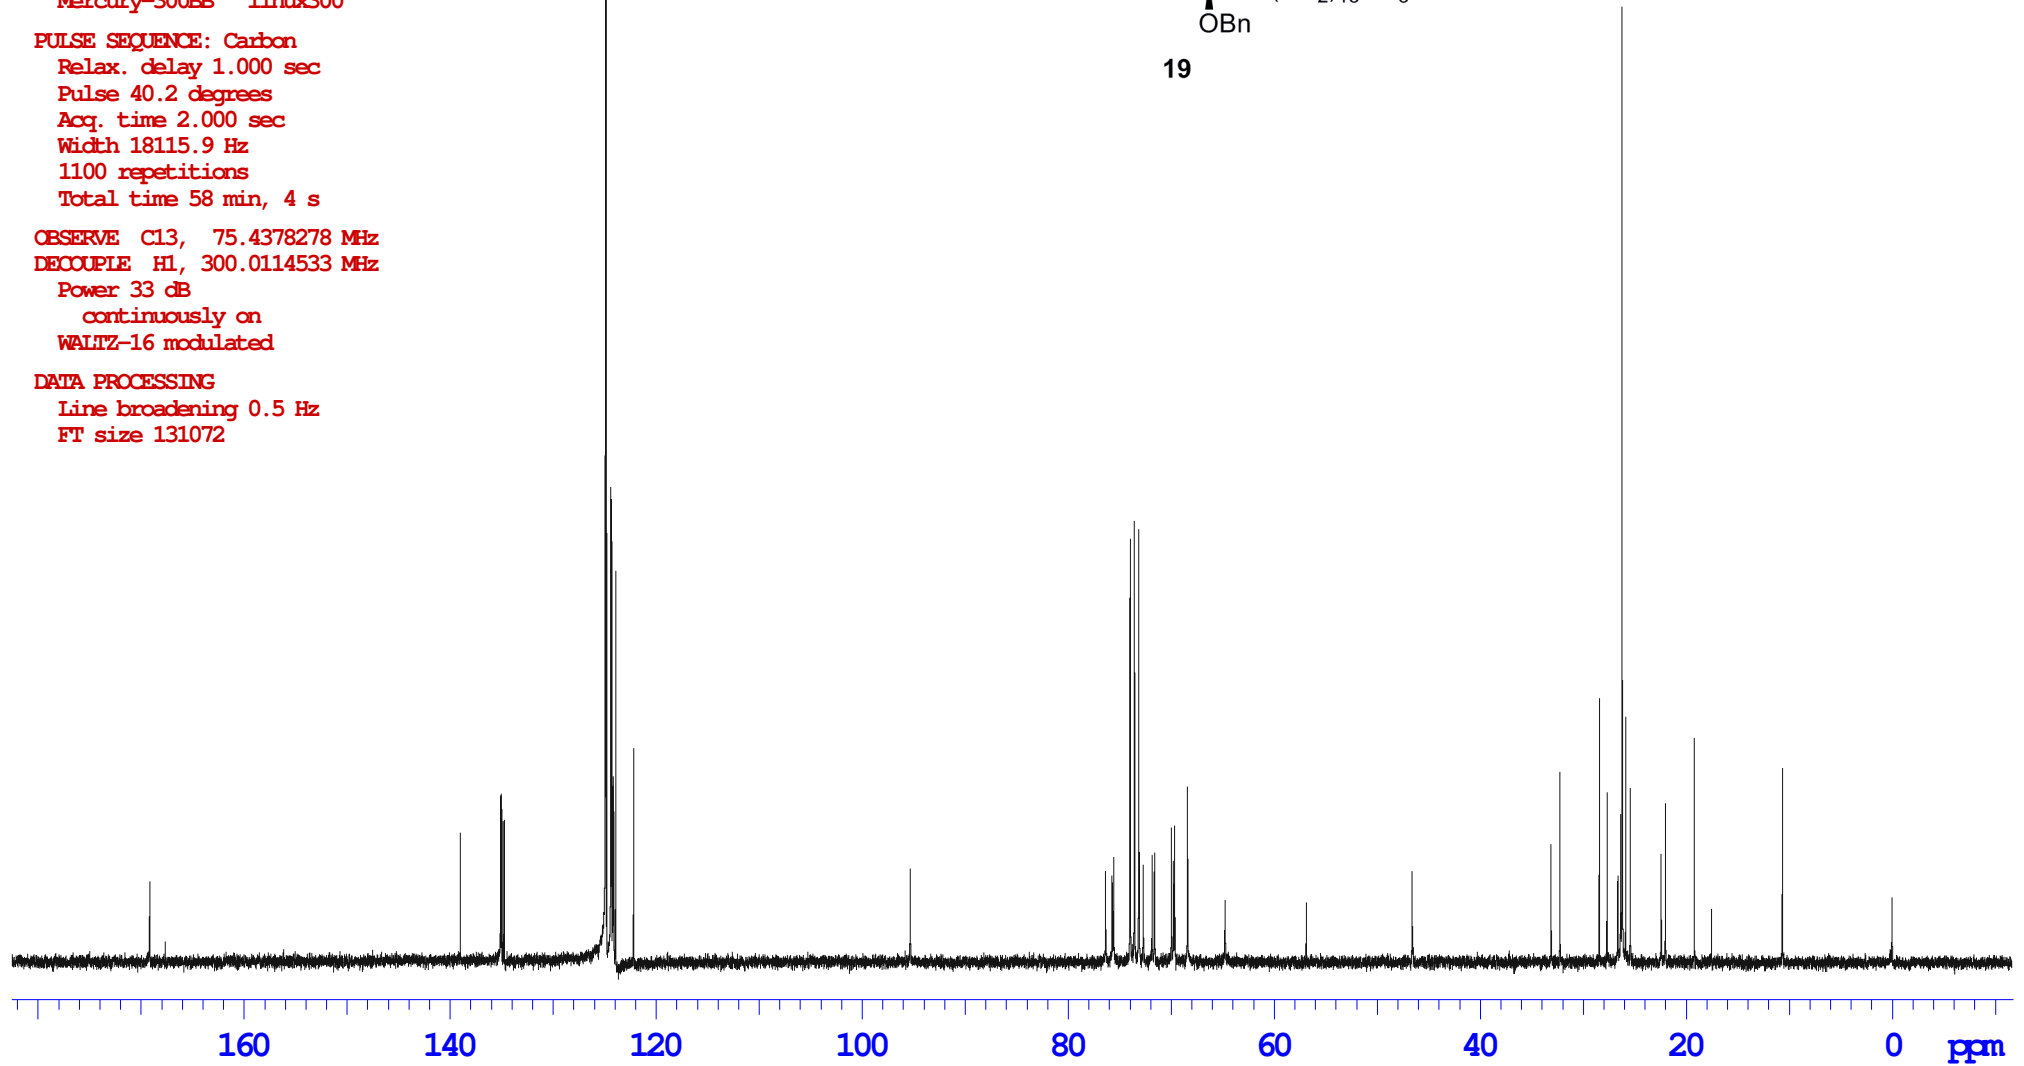

SAMPLE: NP223

File: /home/Data/Nora/NP223/Proton\_Minsw\_17Jun2009\_1.fid

Date: Jun 17 2009

Solvent: cdc13

Temp. 25.0 C / 298.1 K

Operator: Nora

File: Proton\_Minsw\_17Jun2009\_1

Mercury-300EB "linux300"

PULSE SEQUENCE: Proton\_Minsw

Relax. delay 2.000 sec

Pulse 45.0 degrees

Acq. time 3.001 sec

Width 2801.1 Hz

32 repetitions

Total time 1 min, 39 s

OBSERVE HL 300.0099696 MHz

DATA PROCESSING

Line broadening 0.2 Hz

FT size 32768

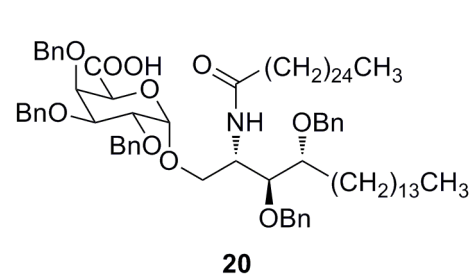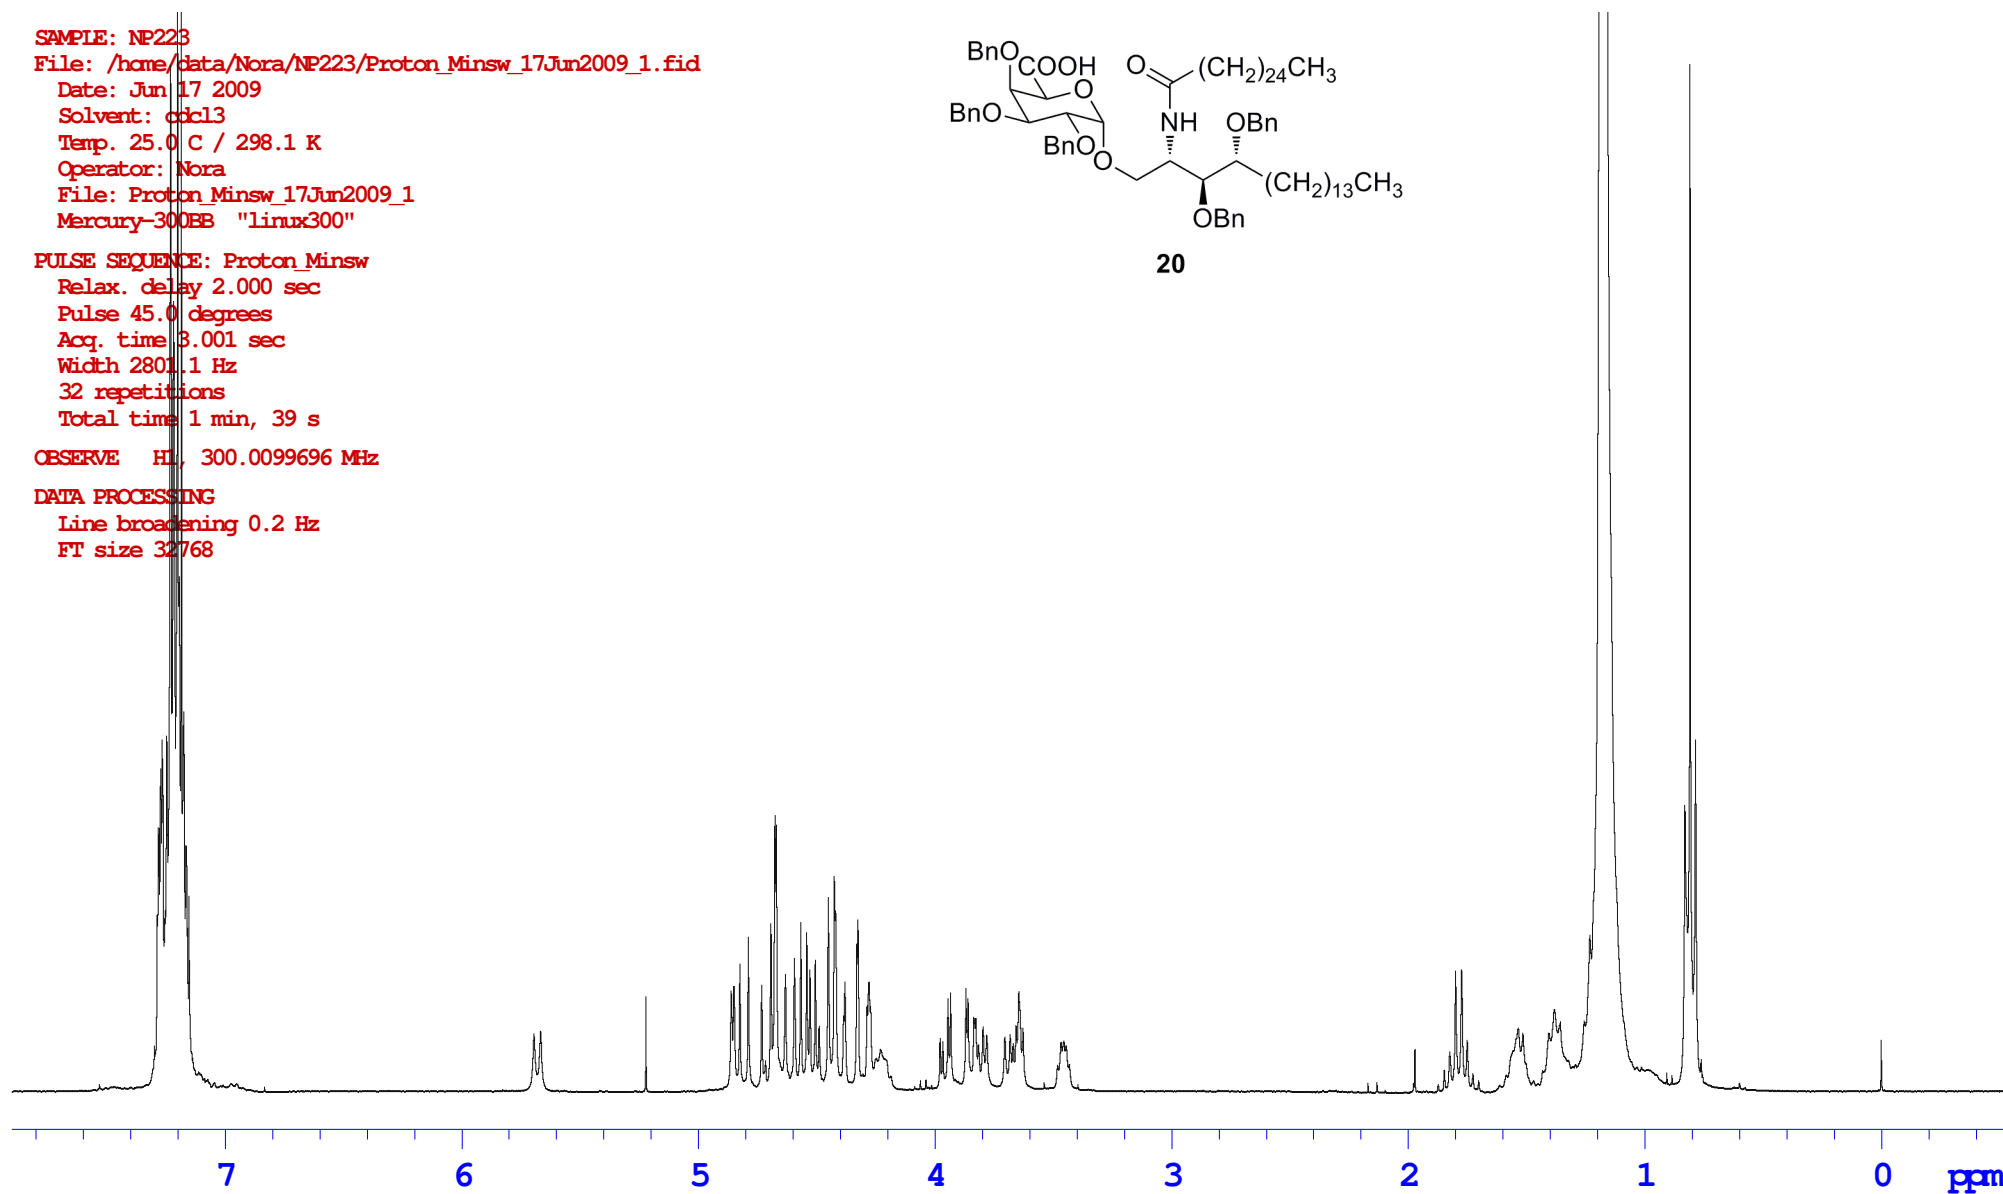

SAMPLE: NP223  
File: /home/data/Nora/NP223/Carbon\_18Jun2009\_3.fid  
Date: Jun 17 2009  
Solvent: cdcl3  
Temp. 25.0 C / 298.1 K  
Operator: Nora  
File: Carbon\_18Jun2009\_3  
Mercury-300EB "linux300"

PULSE SEQUENCE: Carbon  
Relax. delay 1.000 sec  
Pulse 40.2 degrees  
Acq. time 2.000 sec  
Width 18115.9 Hz  
13844 repetitions  
Total time 15 hr, 20 min, 39 s

OBSERVE C13, 75.4375432 MHz  
DECOUPLE H1, 300.0114533 MHz  
Power 33 dB  
continuously on  
WALTZ-16 modulated

DATA PROCESSING  
Line broadening 0.5 Hz  
FT size 131072

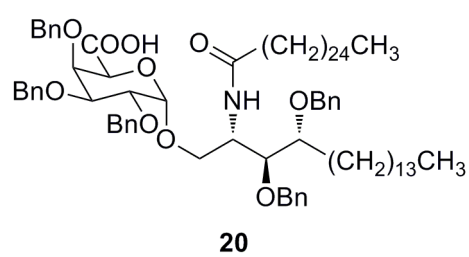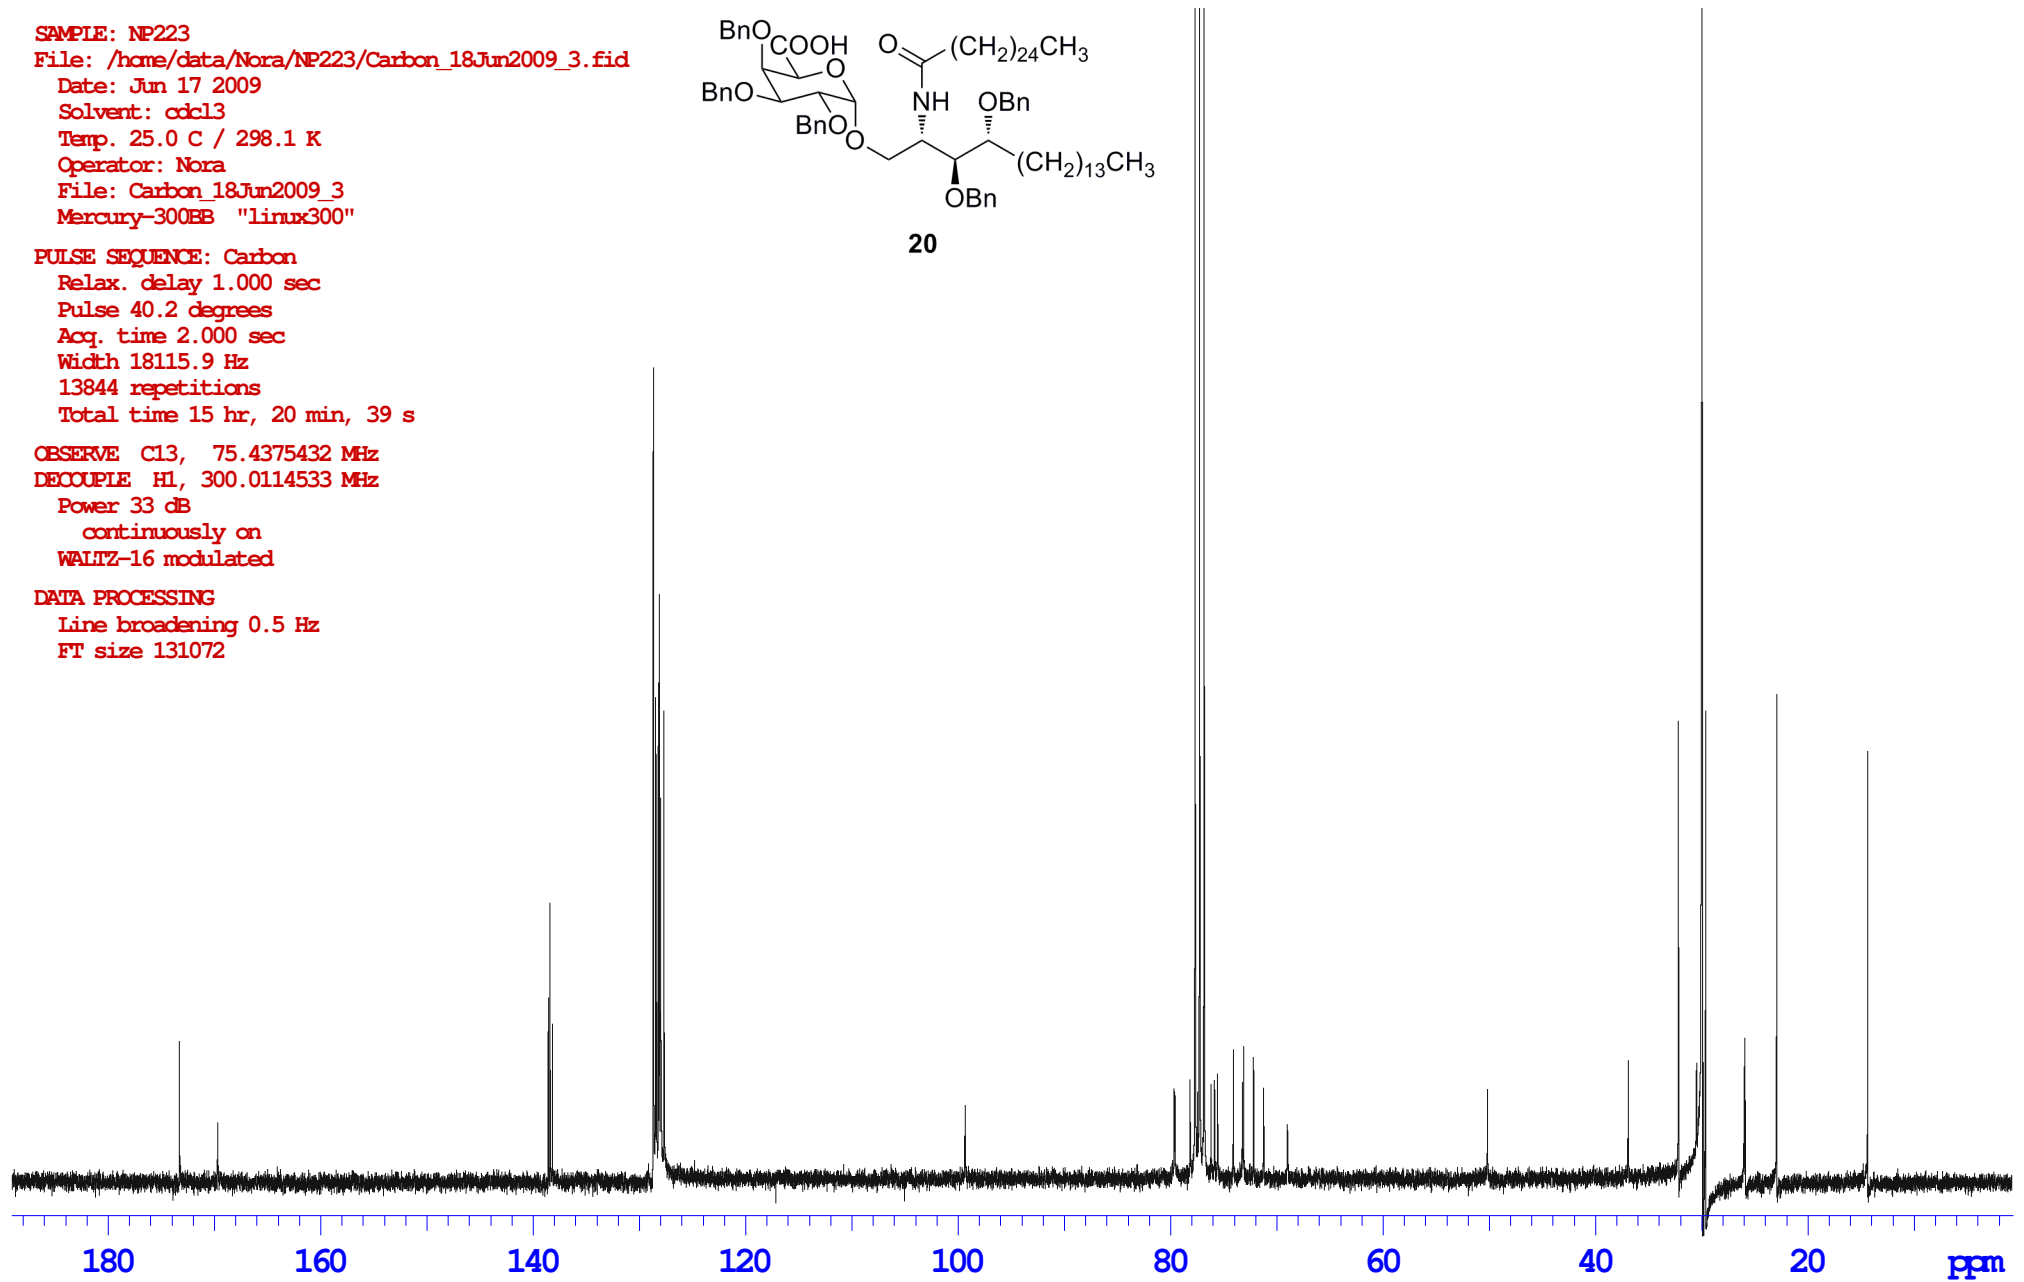

SAMPLE: NP005

File: /home/data/Nora/NP005/Proton\_Minsw\_21Oct2009\_1.fid

Date: Oct 21 2009

Solvent: cdcl3

Temp. 25.0 C / 298.1 K

Operator: Nora

File: Proton\_Minsw\_21Oct2009\_1

Mercury-300EB "linux300"

PULSE SEQUENCE: Proton\_Minsw

Relax. delay 2.000 sec

Pulse 45.0 degrees

Acq. time 3.001 sec

Width 2795.6 Hz

32 repetitions

Total time 1 min, 39 s

OBSERVE HL, 300.0099471 MHz

DATA PROCESSING

Line broadening 0.2 Hz

FT size 32768

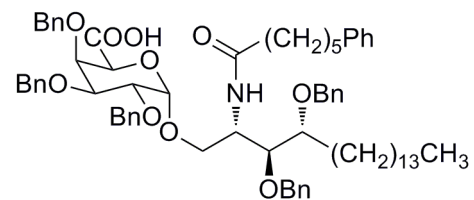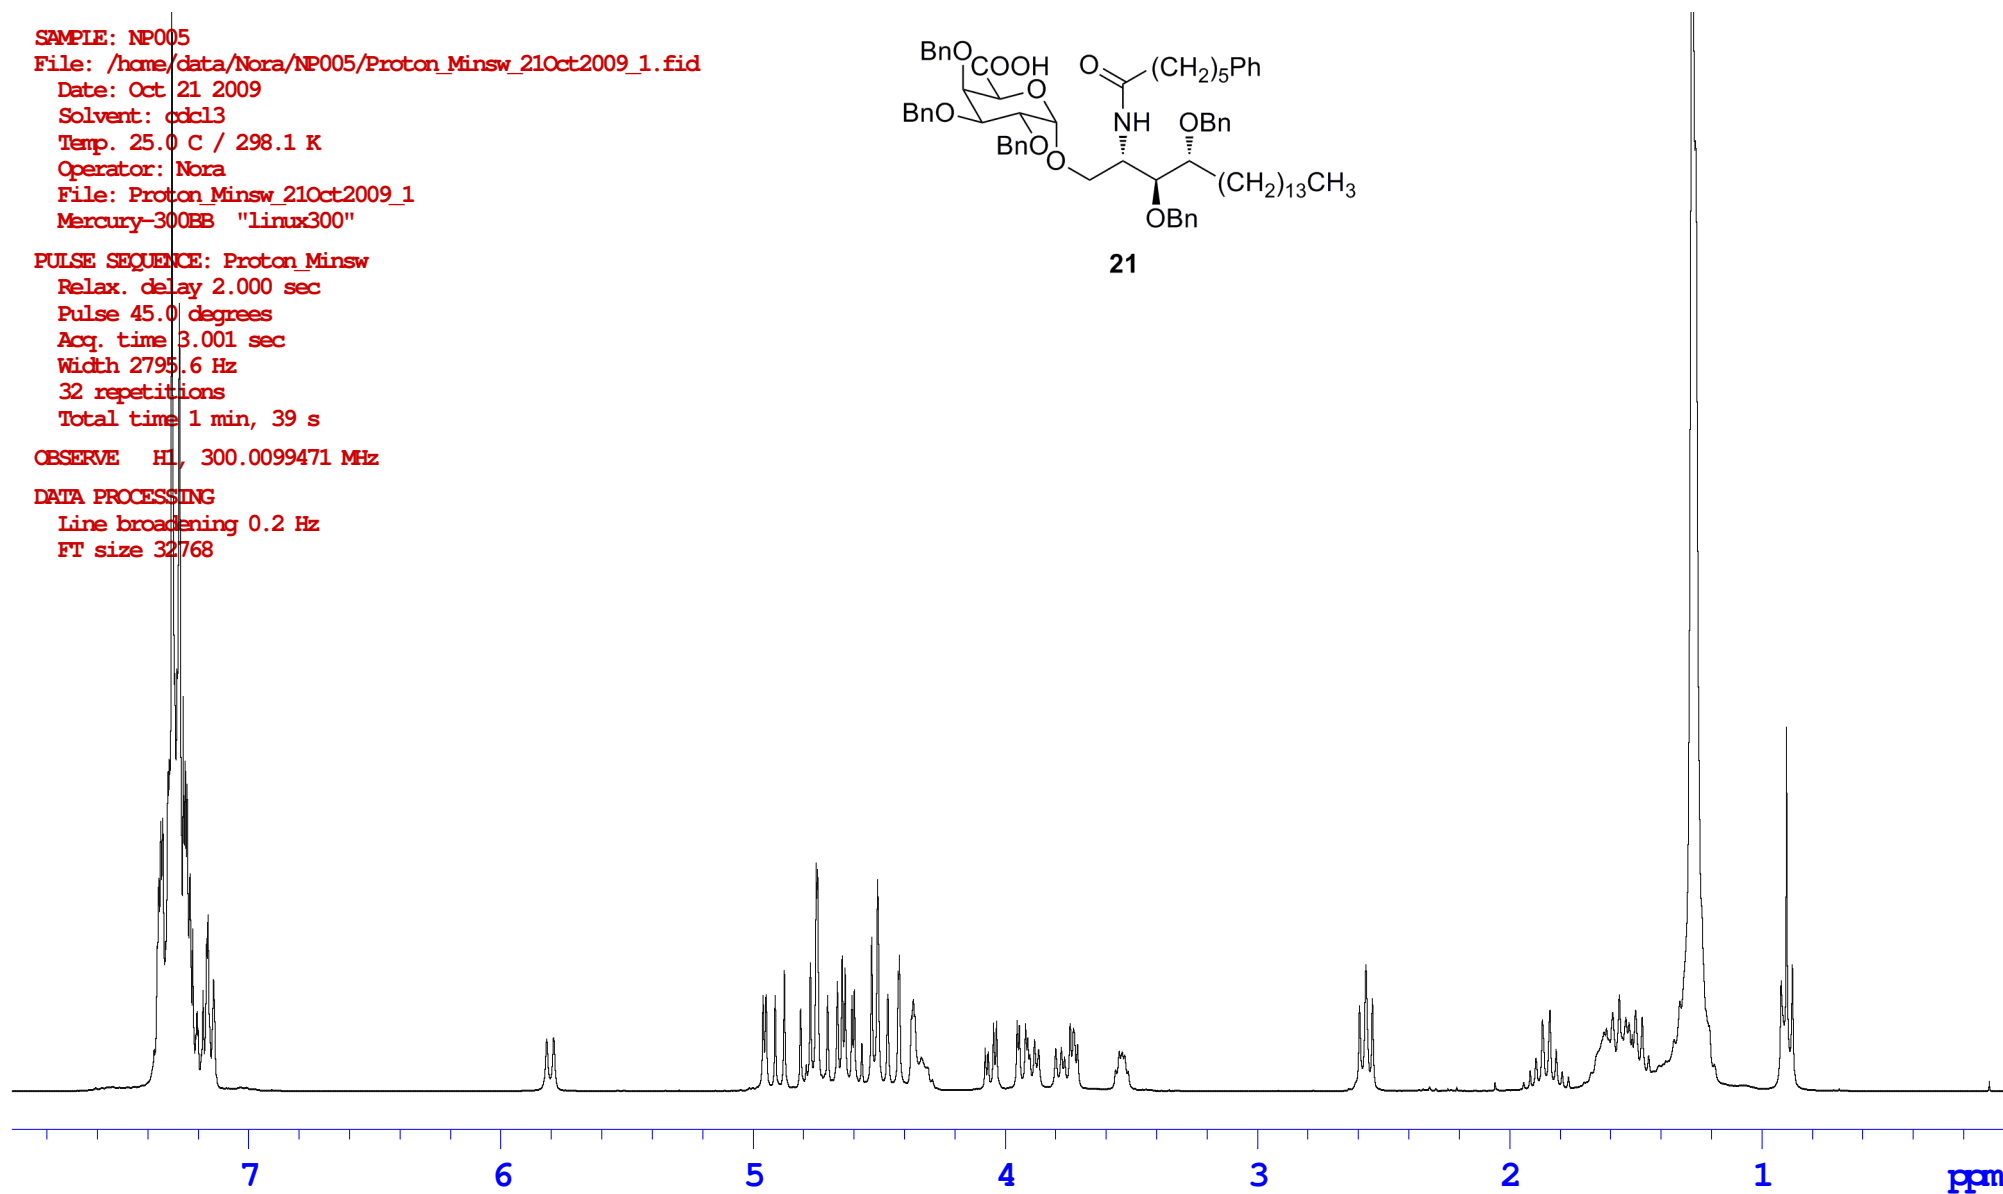

SAMPLE: NP005

File: /home/data/Nora/NP005/Carbon\_12h\_21Oct2009\_1.fid

Date: Oct 21 2009

Solvent: cdcl3

Temp. 25.0 C / 298.1 K

Operator: Nora

File: Carbon\_12h\_21Oct2009\_1

Mercury-300EB "linux300"

PULSE SEQUENCE: Carbon\_12h

Relax. delay 1.000 sec

Pulse 45.0 degrees

Acq. time 2.000 sec

Width 18115.9 Hz

11000 repetitions

Total time 9 hr, 38 min, 46 s

OBSERVE C13, 75.4375432 MHz

DECOUPLE H1, 300.0114533 MHz

Power 33 dB

continuously on

WALTZ-16 modulated

DATA PROCESSING

Line broadening 0.5 Hz

FT size 131072

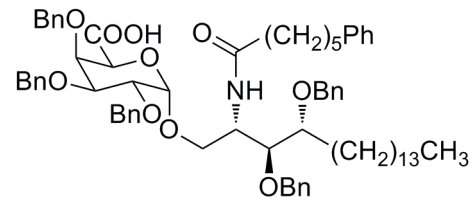

21

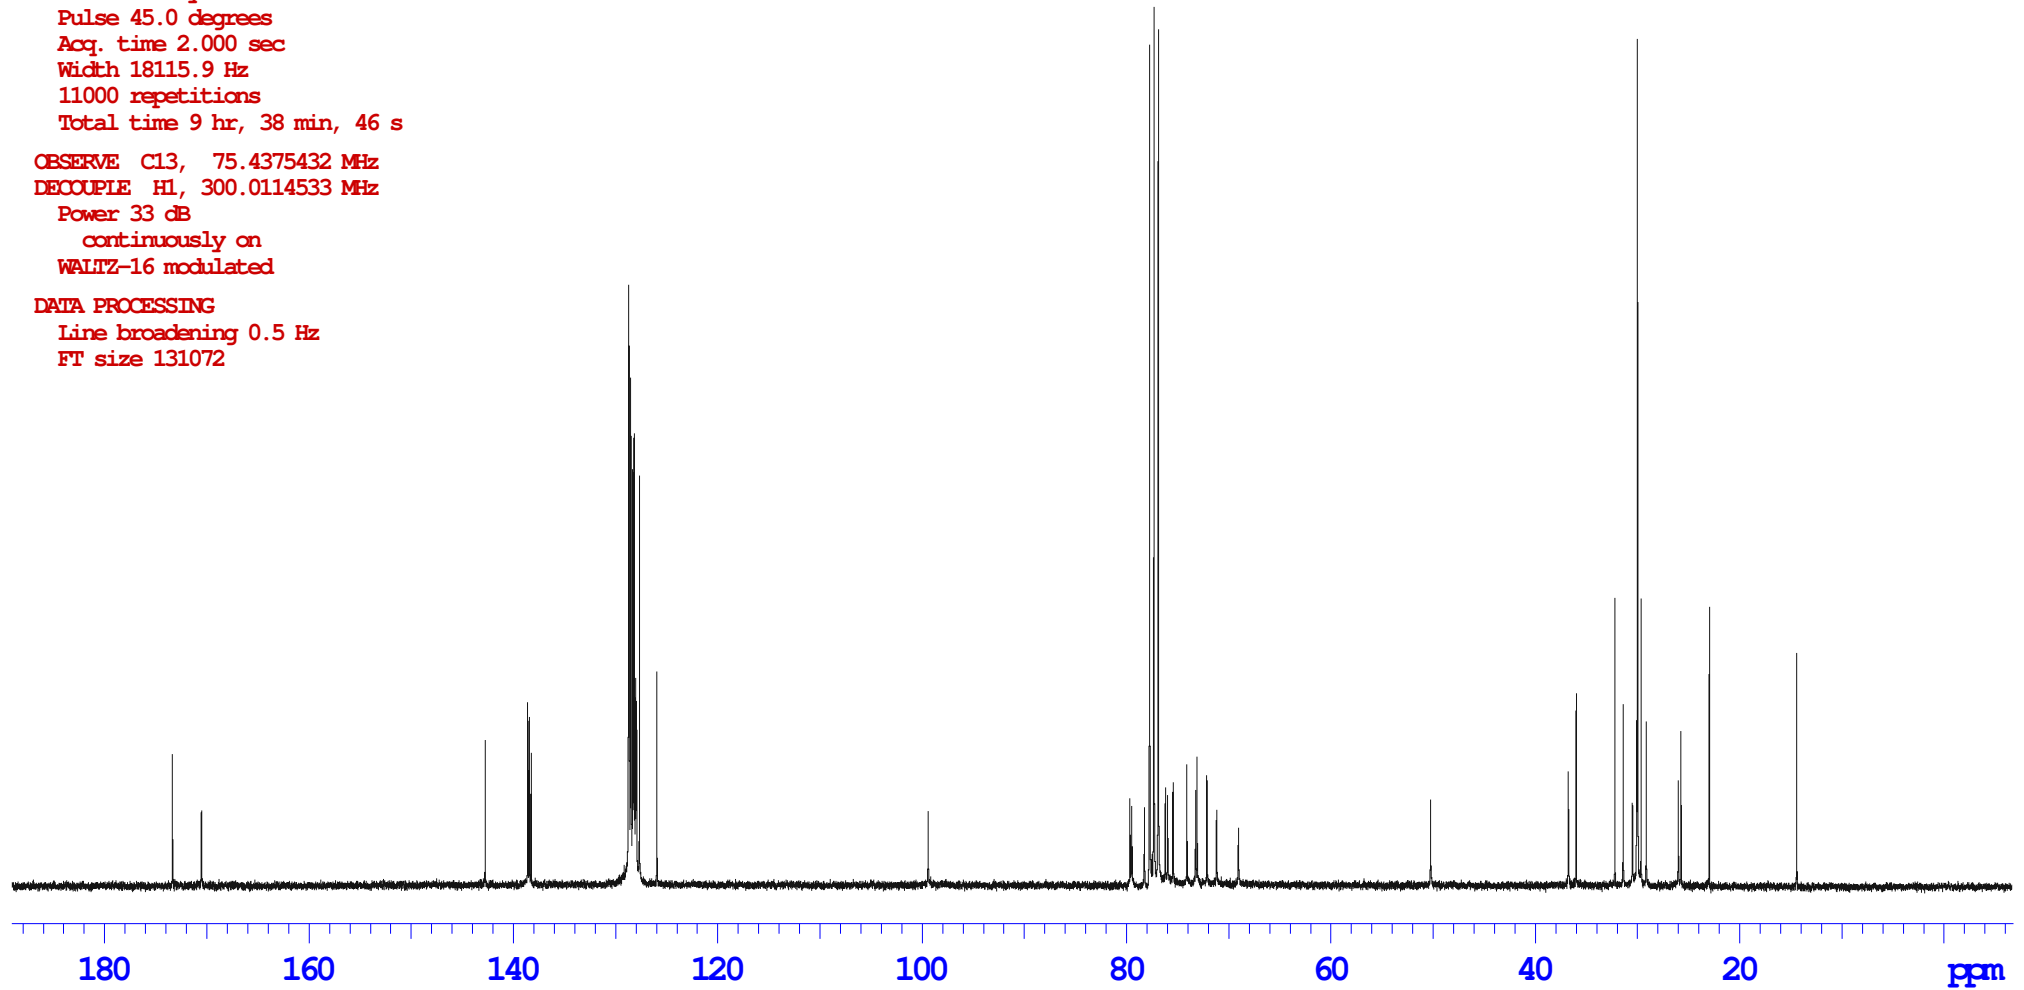

SAMPLE: NP010

File: /home/data/Nora/NP010/Proton\_Minsw\_10Dec2009\_1.fid

Date: Dec 10 2009

Solvent: pyridine

Temp. 25.0 C / 298.1 K

Operator: Nora

File: Proton\_Minsw\_10Dec2009\_1

Mercury-300EB "linux300"

PULSE SEQUENCE: Proton\_Minsw

Relax. delay 2.000 sec

Pulse 45.0 degrees

Acq. time 2.999 sec

Width 3039.5 Hz

32 repetitions

Total time 1 min, 39 s

OBSERVE H1, 300.0094896 MHz

DATA PROCESSING

Line broadening 0.2 Hz

FT size 32768

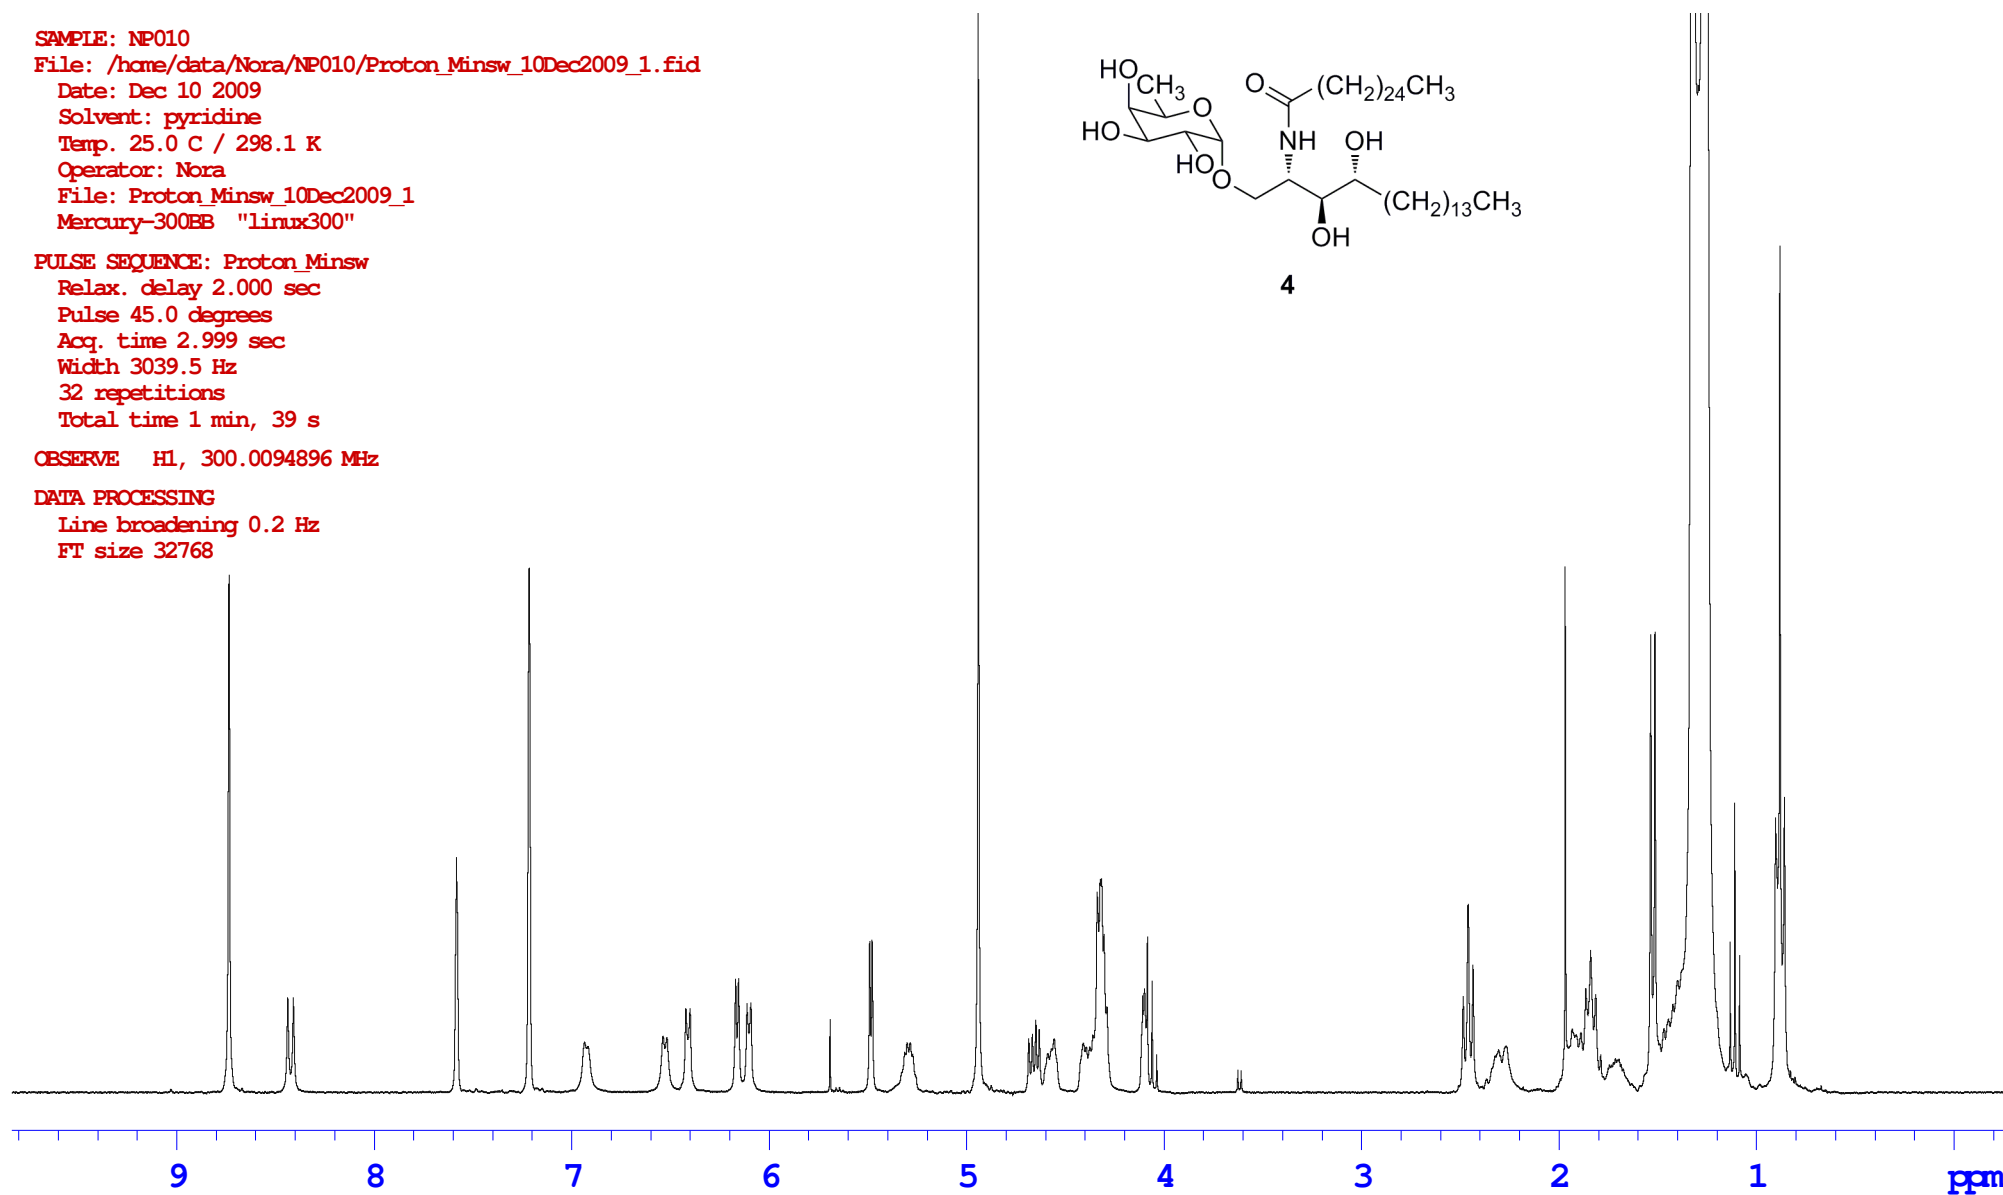



SAMPLE: NP010  
File: /home/data/Nora/NP010/Carbon\_12h\_10Dec2009\_1.fid  
Date: Dec 10 2009  
Solvent: pyridine  
Temp. 25.0 C / 298.1 K  
Operator: Nora  
File: Carbon\_12h\_10Dec2009\_1  
Mercury-300EB "linux300"

PULSE SEQUENCE: Carbon\_12h  
Relax. delay 1.000 sec  
Pulse 45.0 degrees  
Acq. time 2.000 sec  
Width 18115.9 Hz  
14400 repetitions  
Total time 12 hr, 37 min, 36 s

OBSERVE C13, 75.4375198 MHz  
DECOUPLE H1, 300.0113603 MHz  
Power 33 dB  
continuously on  
WALTZ-16 modulated

DATA PROCESSING  
Line broadening 0.5 Hz  
FT size 131072

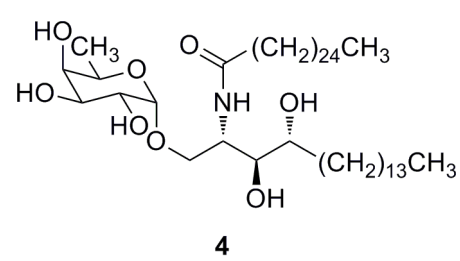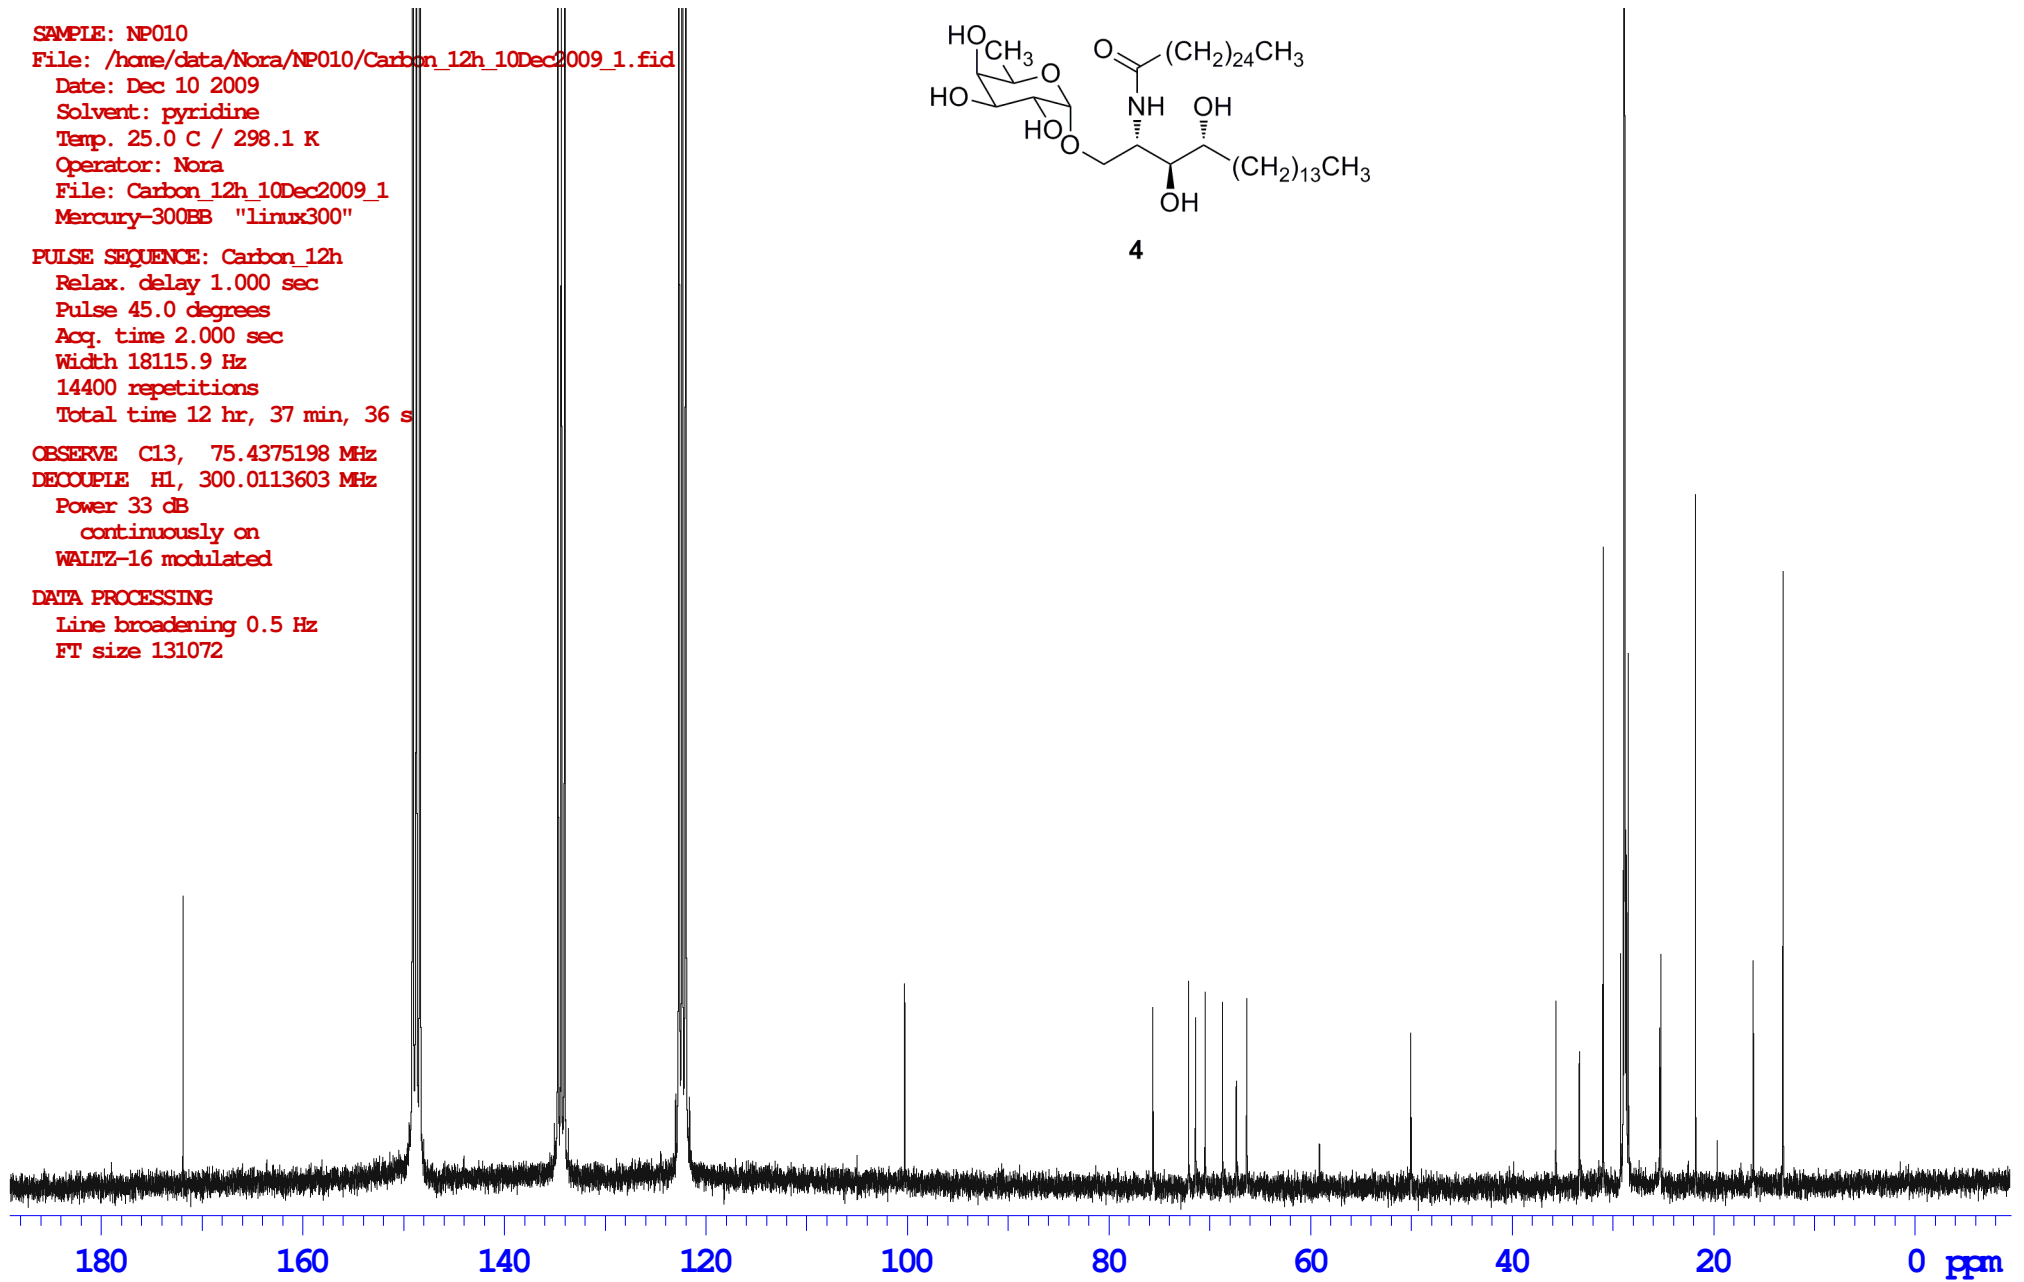

SAMPLE: NP008

File: /home/data/Nora/NP008/Proton\_Minsw\_10Nov2009\_1.fid

Date: Nov 10 2009

Solvent: cd3od

Temp. 25.0 C / 298.1 K

Operator: Nora

File: Proton\_Minsw\_10Nov2009\_1

Mercury-300EB "linux300"

PULSE SEQUENCE: Proton\_Minsw

Relax. delay 2.000 sec

Pulse 45.0 degrees

Acq. time 2.998 sec

Width 3026.6 Hz

32 repetitions

Total time 1 min, 39 s

OBSERVE H1, 300.0111287 MHz

DATA PROCESSING

Line broadening 0.2 Hz

FT size 32768

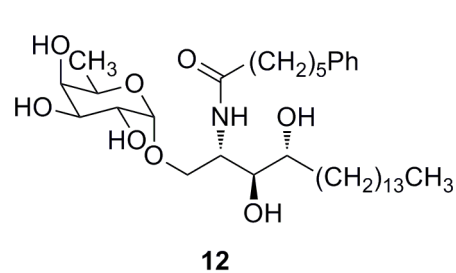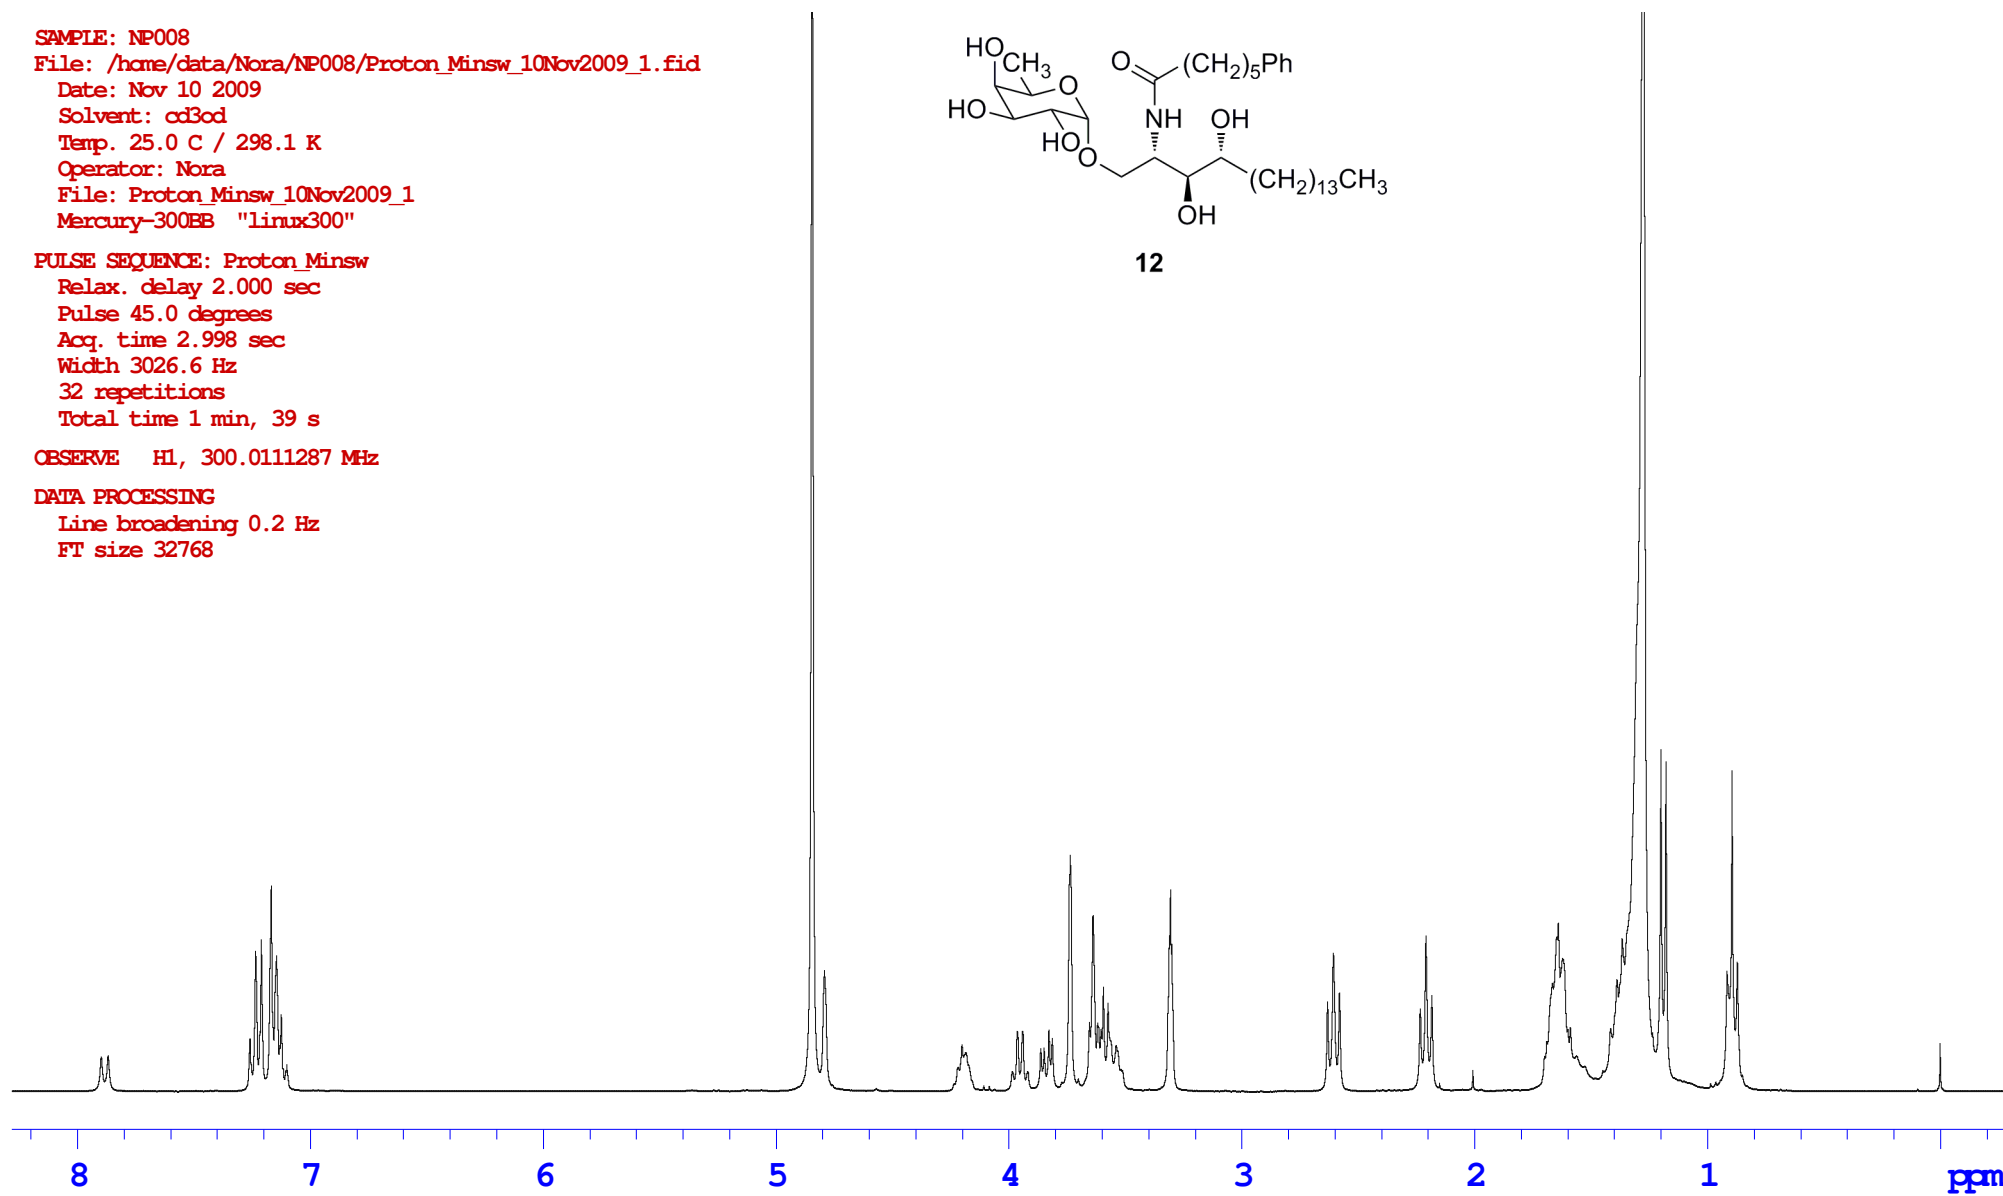

SAMPLE: NP008

File: /home/data/Nora/NP008/Carbon\_10Nov2009\_1.fid

Date: Nov 10 2009

Solvent: cd3od

Temp. 25.0 C / 298.1 K

Operator: Nora

File: Carbon\_10Nov2009\_1

Mercury-300EB "linux300"

PULSE SEQUENCE: Carbon

Relax. delay 1.000 sec

Pulse 40.2 degrees

Acq. time 2.000 sec

Width 18115.9 Hz

15000 repetitions

Total time 13 hr, 9 min, 10 s

OBSERVE C13, 75.4378404 MHz

DECOUPLE H1, 300.0126353 MHz

Power 33 dB

continuously on

WALTZ-16 modulated

DATA PROCESSING

Line broadening 0.5 Hz

FT size 131072

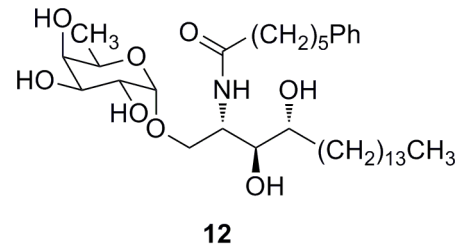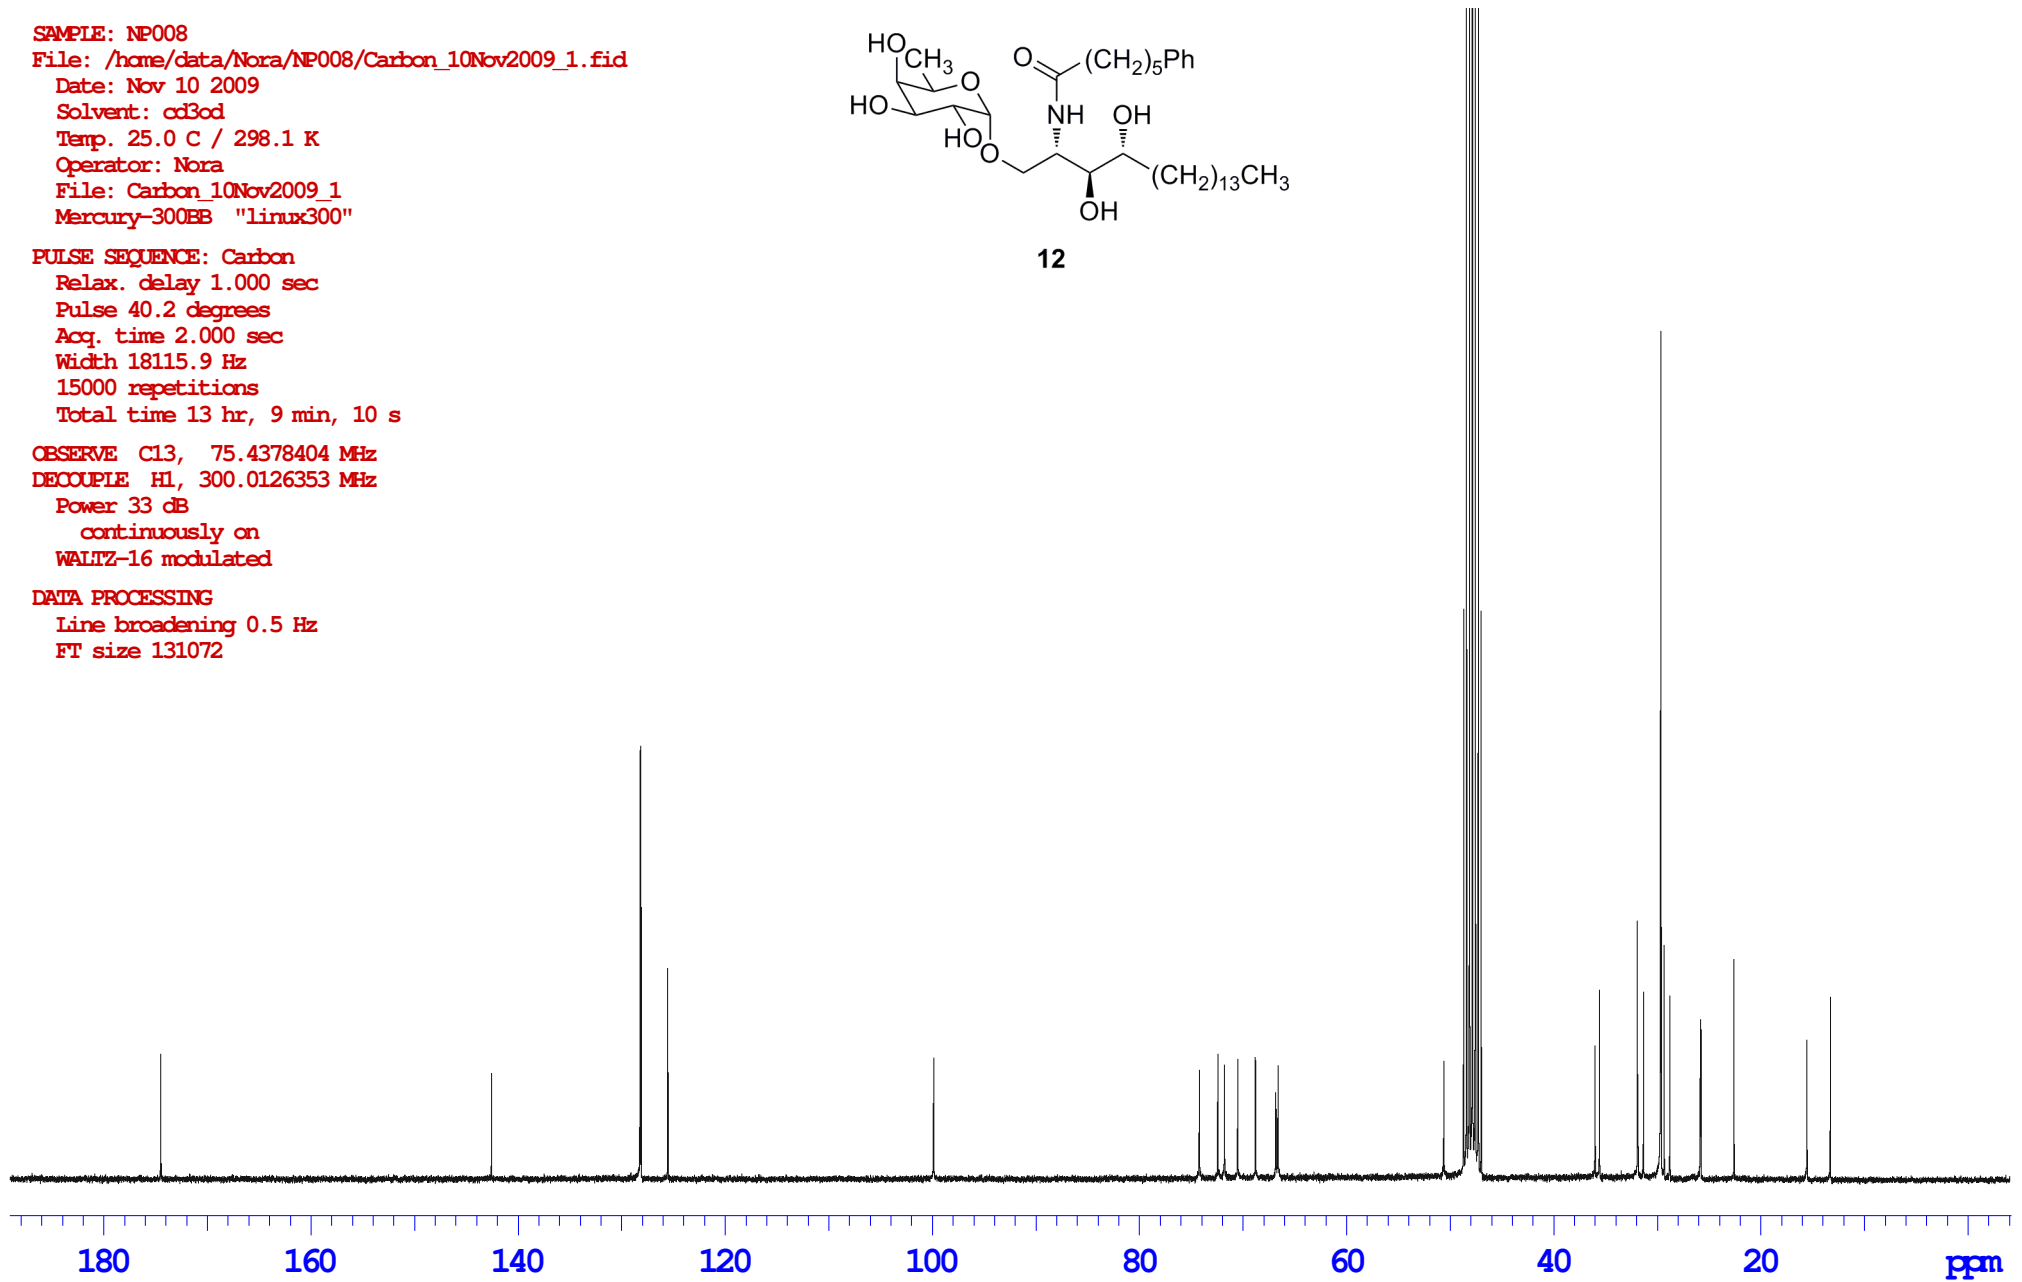

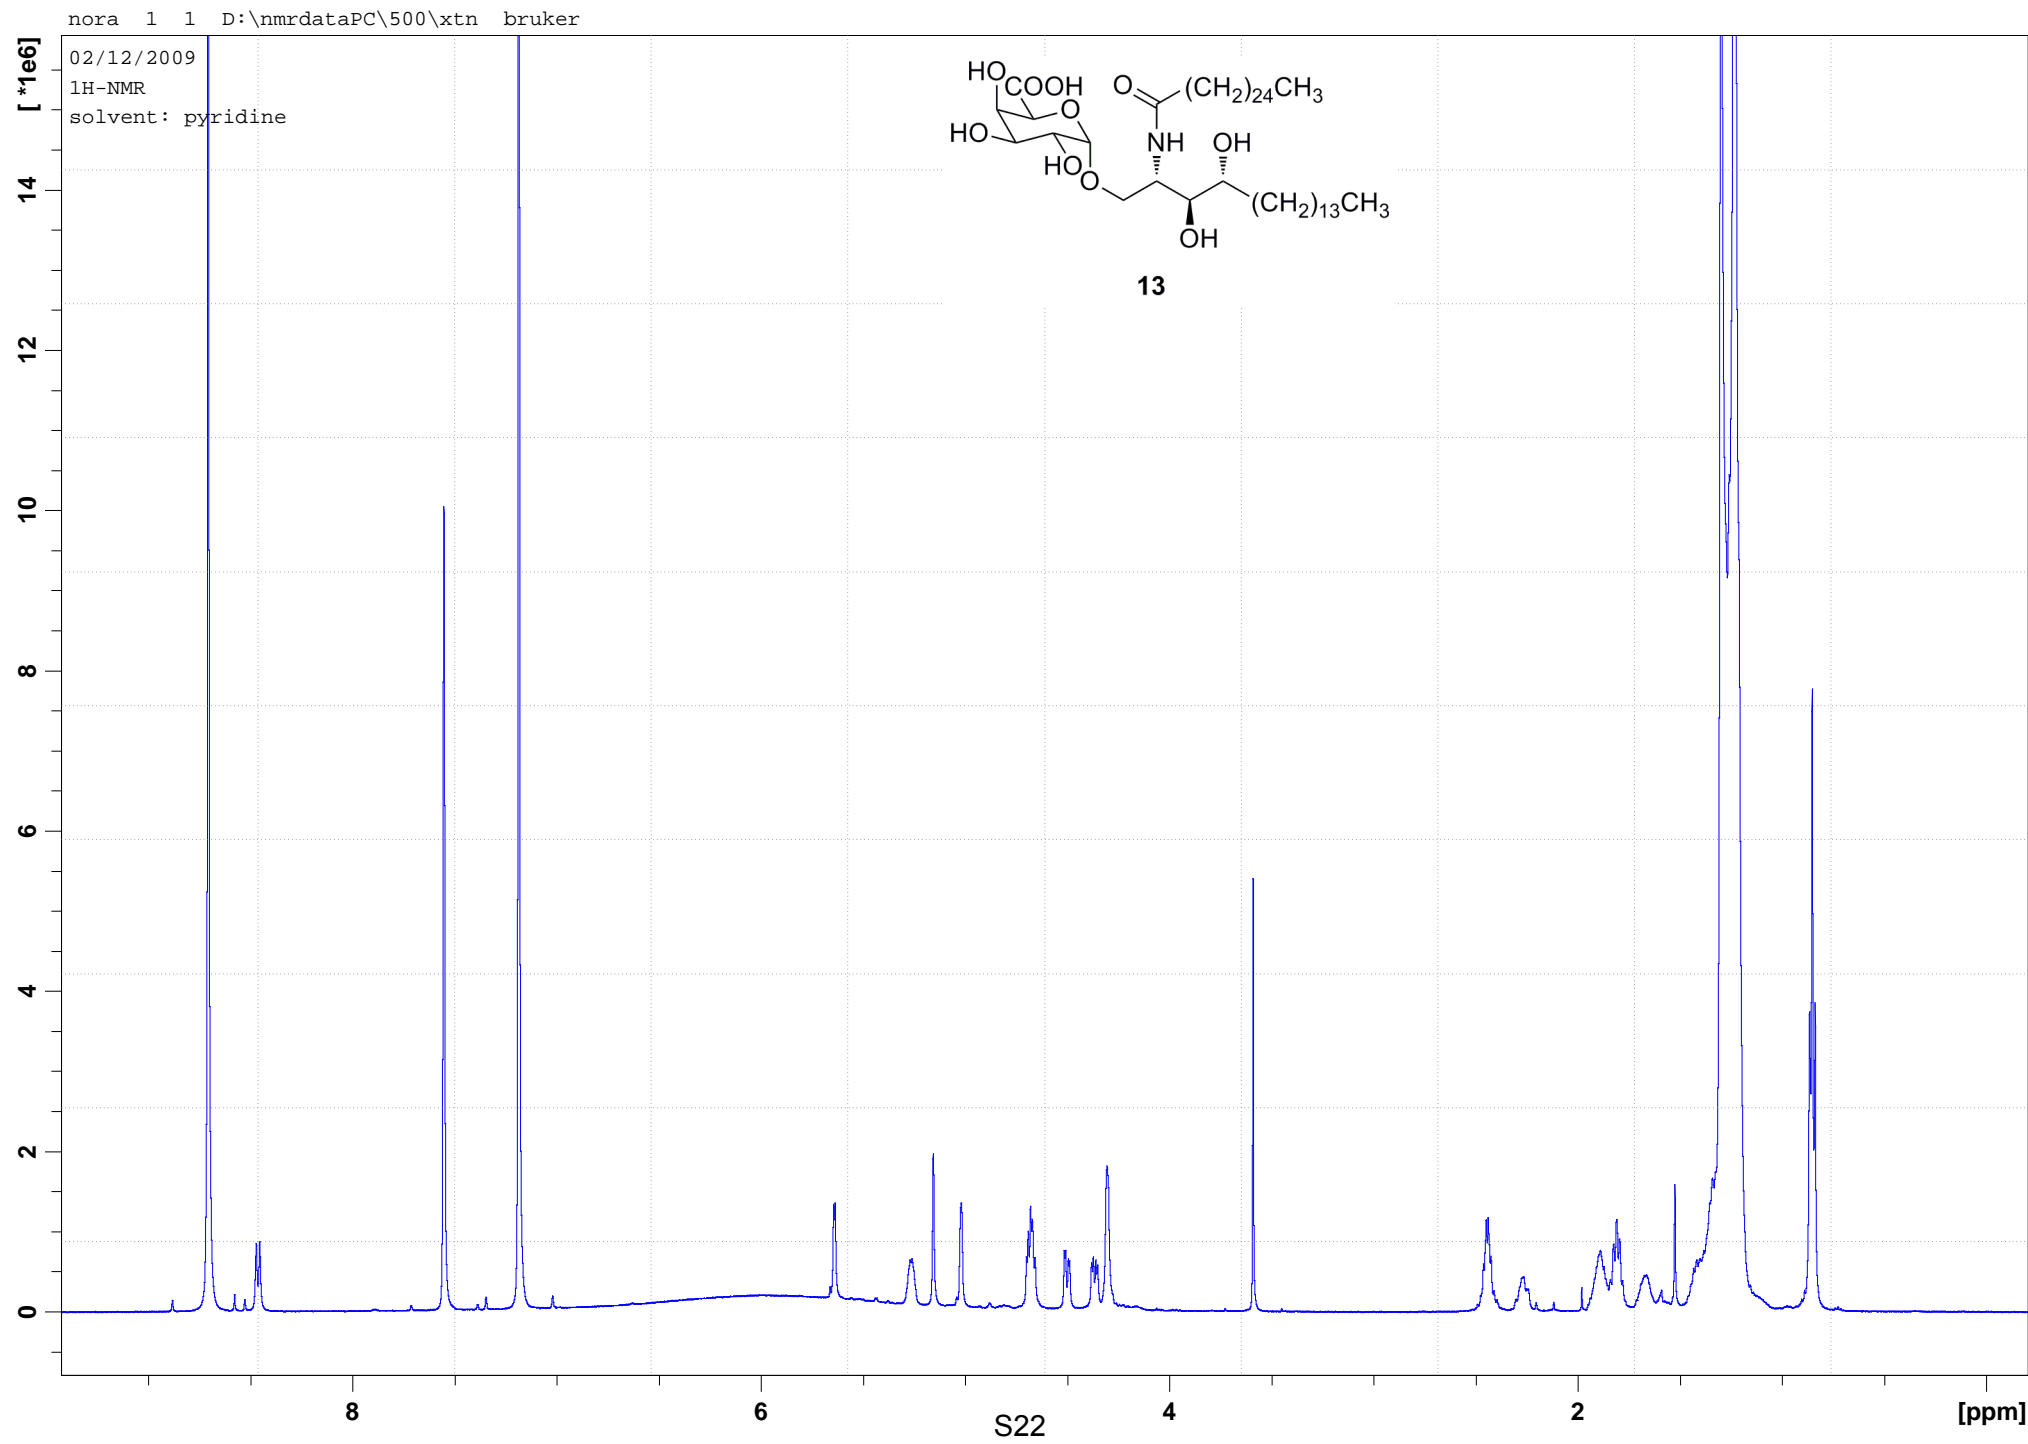

SAMPLE: NP244  
File: /home/data/Nora/NP244/Carbon\_12h\_06Aug2009\_1.fid  
Date: Aug 6 2009  
Solvent: pyridine  
Temp. 25.0 C / 298.1 K  
Operator: Nora  
File: Carbon\_12h\_06Aug2009\_1  
Mercury-300EB "linux300"

PULSE SEQUENCE: Carbon\_12h  
Relax. delay 1.000 sec  
Pulse 45.0 degrees  
Acq. time 2.000 sec  
Width 18115.9 Hz  
17500 repetitions  
Total time 15 hr, 20 min, 39 s

OBSERVE C13, 75.4375198 MHz  
DECOUPLE H1, 300.0113603 MHz  
Power 33 dB  
continuously on  
WALTZ-16 modulated

DATA PROCESSING  
Line broadening 0.5 Hz  
FT size 131072

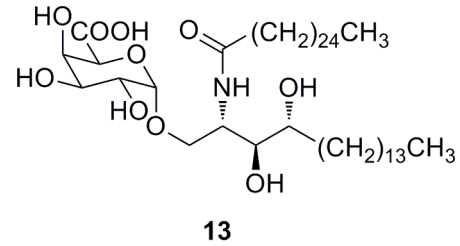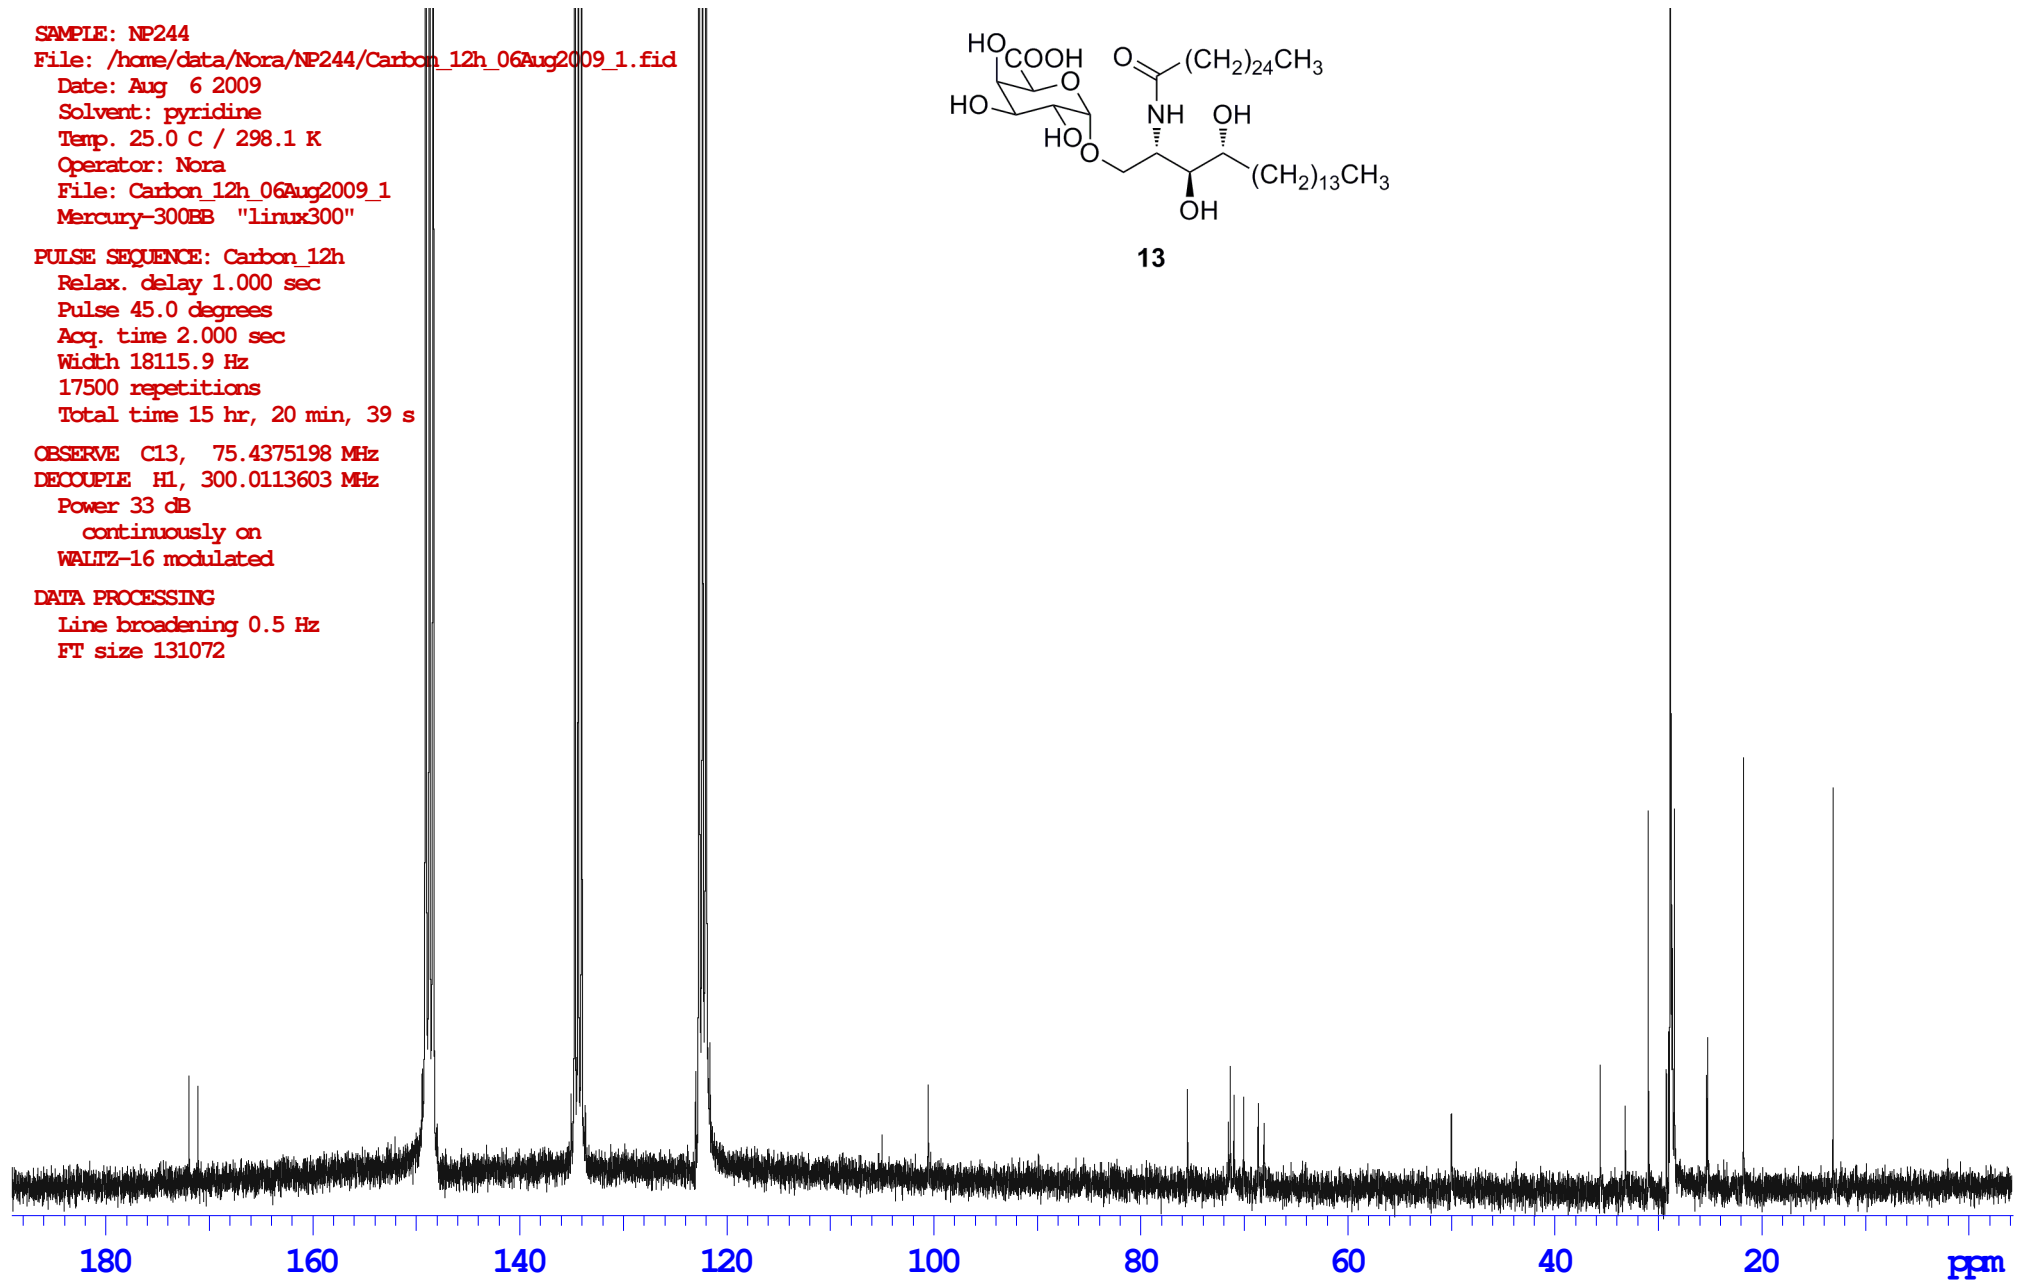

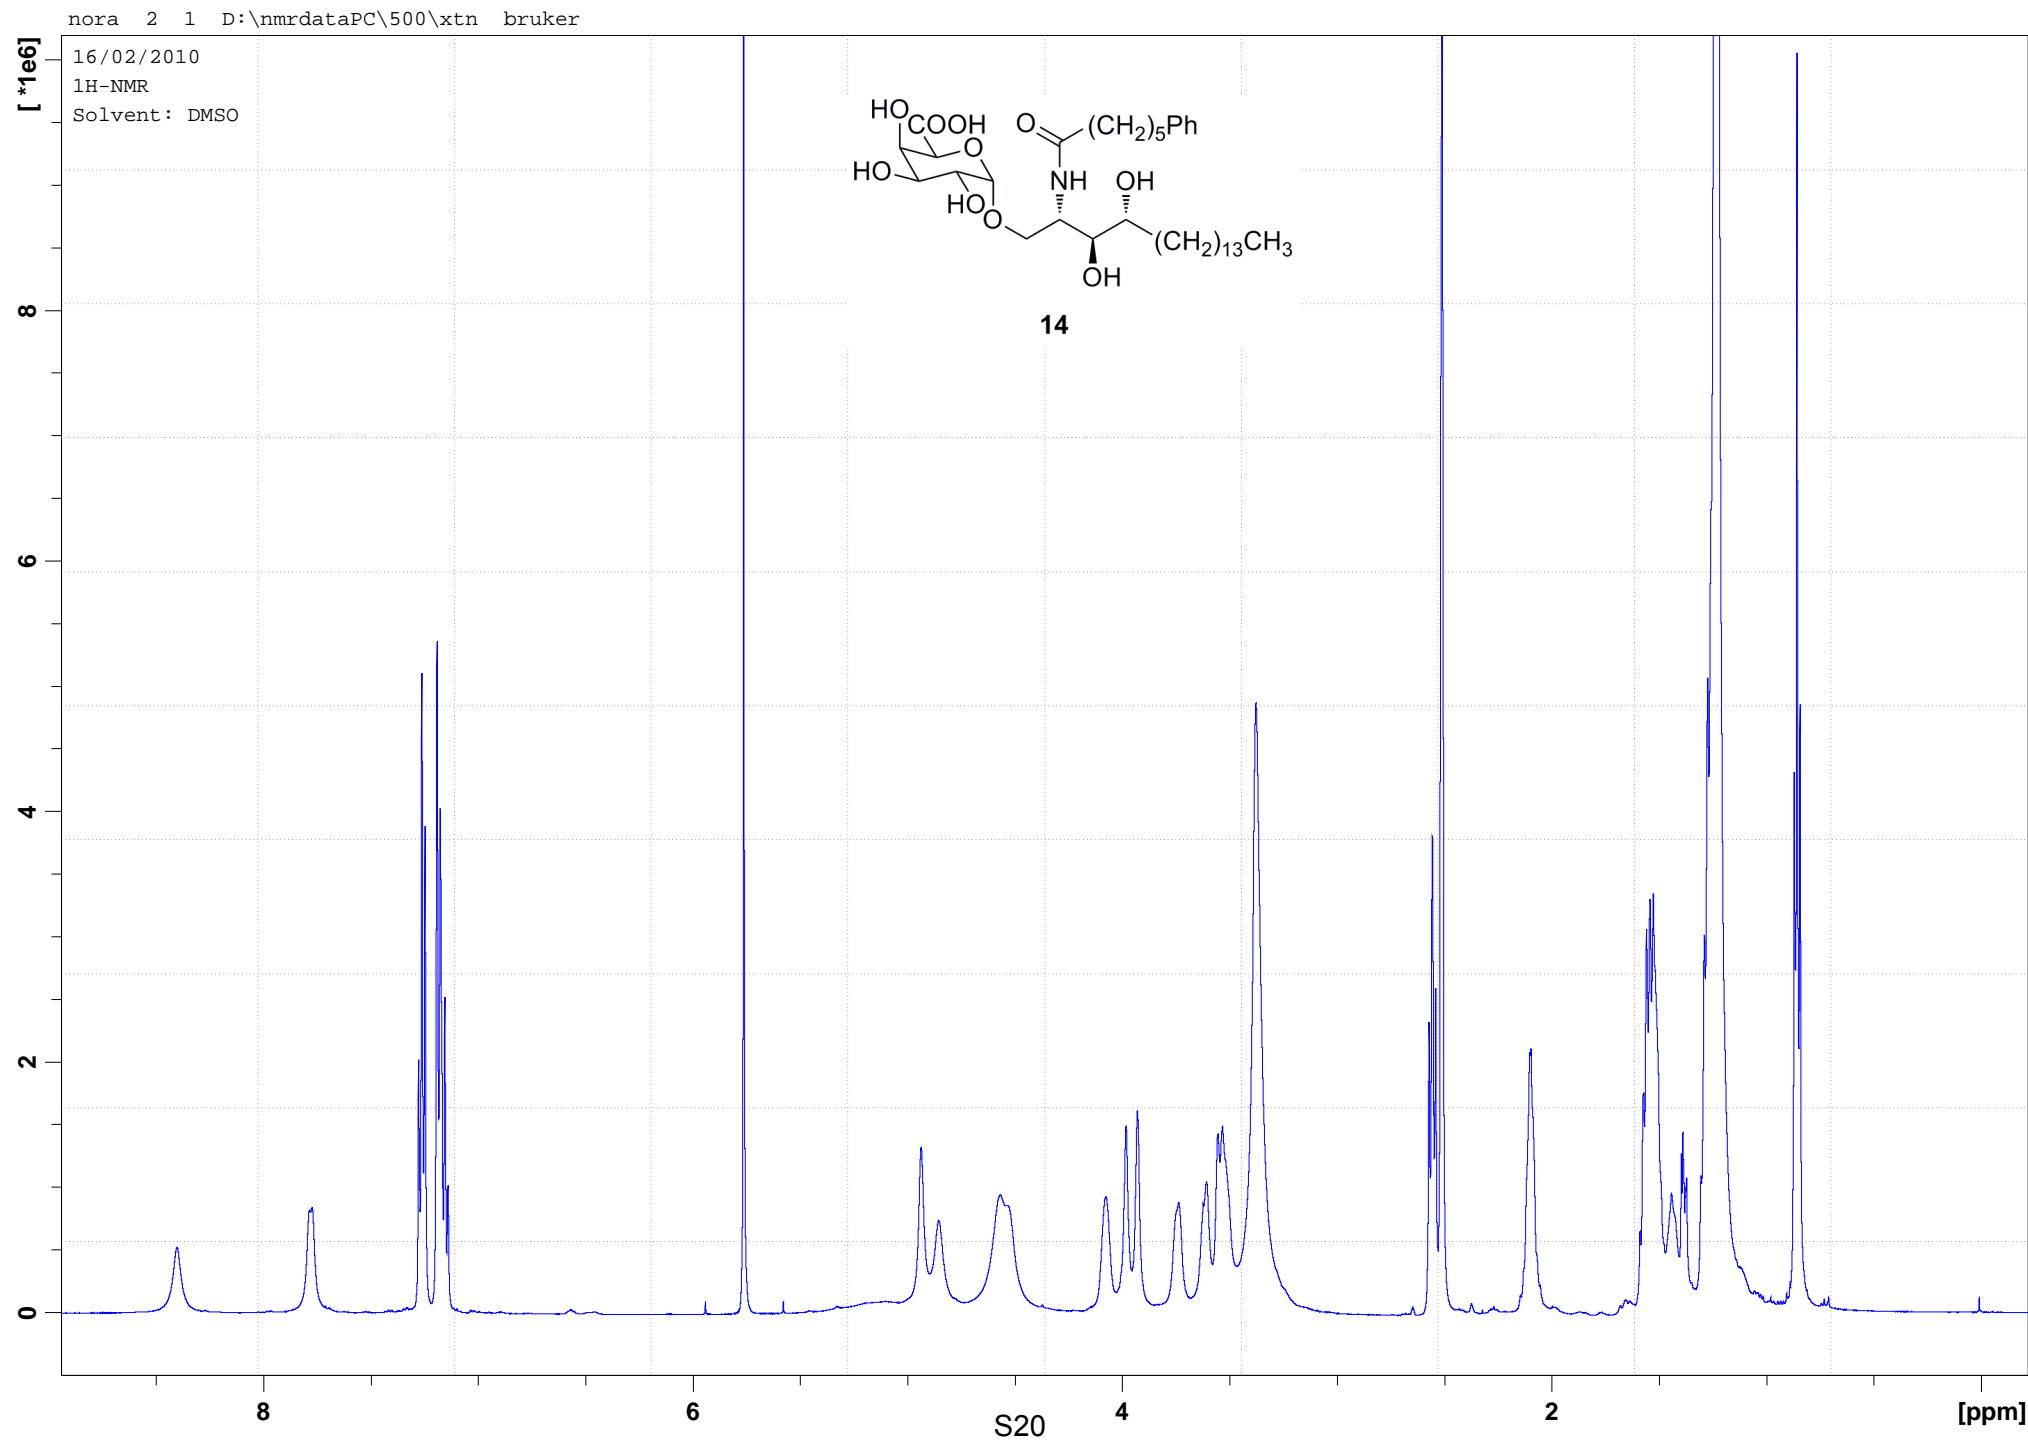

SAMPLE: NP006

File: /home/data/Nora/NP006/Carbon\_12h\_25Jan2010\_1.fid

Date: Jan 25 2010

Solvent: dmso

Temp. 25.0 C / 298.1 K

Operator: Nora

File: Carbon\_12h\_25Jan2010\_1

Mercury-300EB "linux300"

PULSE SEQUENCE: Carbon\_12h

Relax. delay 1.000 sec

Pulse 45.0 degrees

Acq. time 2.000 sec

Width 18115.9 Hz

16960 repetitions

Total time 15 hr, 46 min, 57 s

OBSERVE C13, 75.4379015 MHz

DECOUPLE H1, 300.0128784 MHz

Power 33 dB

continuously on

WALTZ-16 modulated

DATA PROCESSING

Line broadening 0.5 Hz

FT size 131072

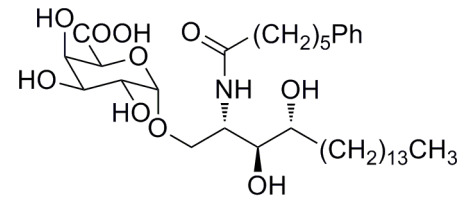

14

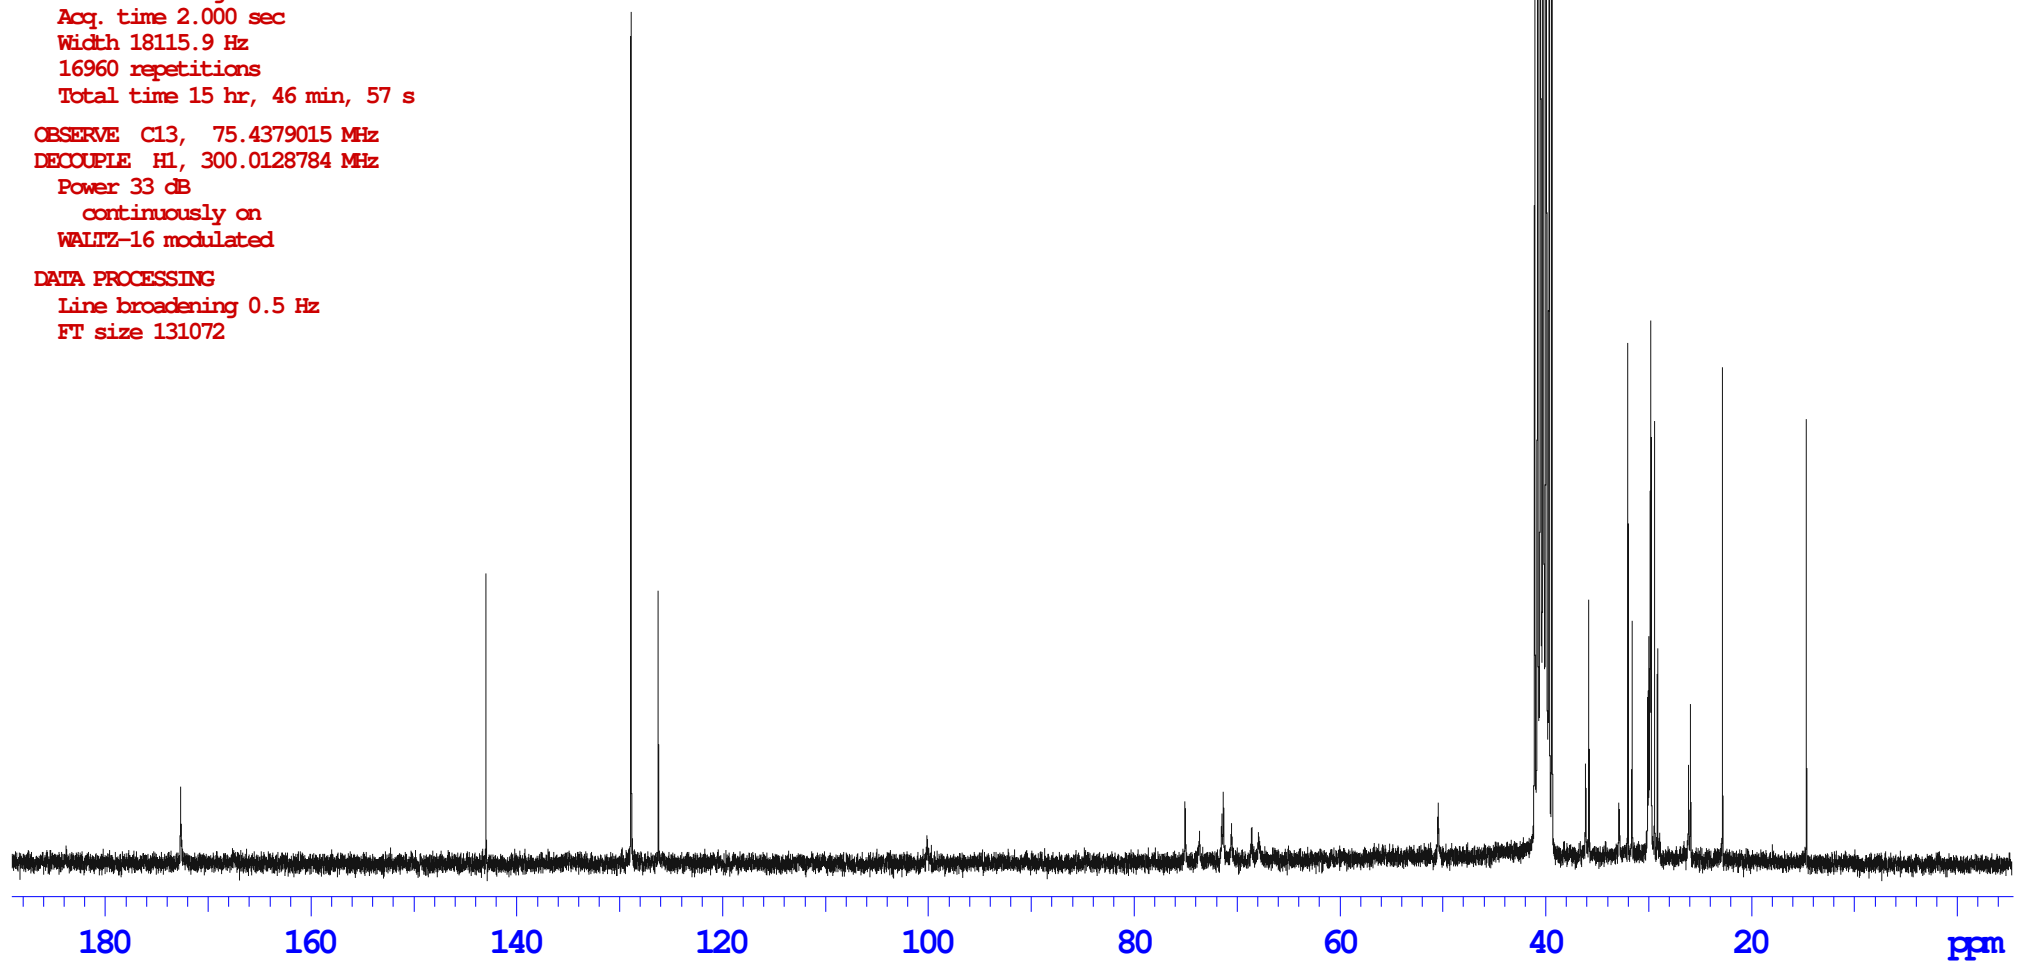

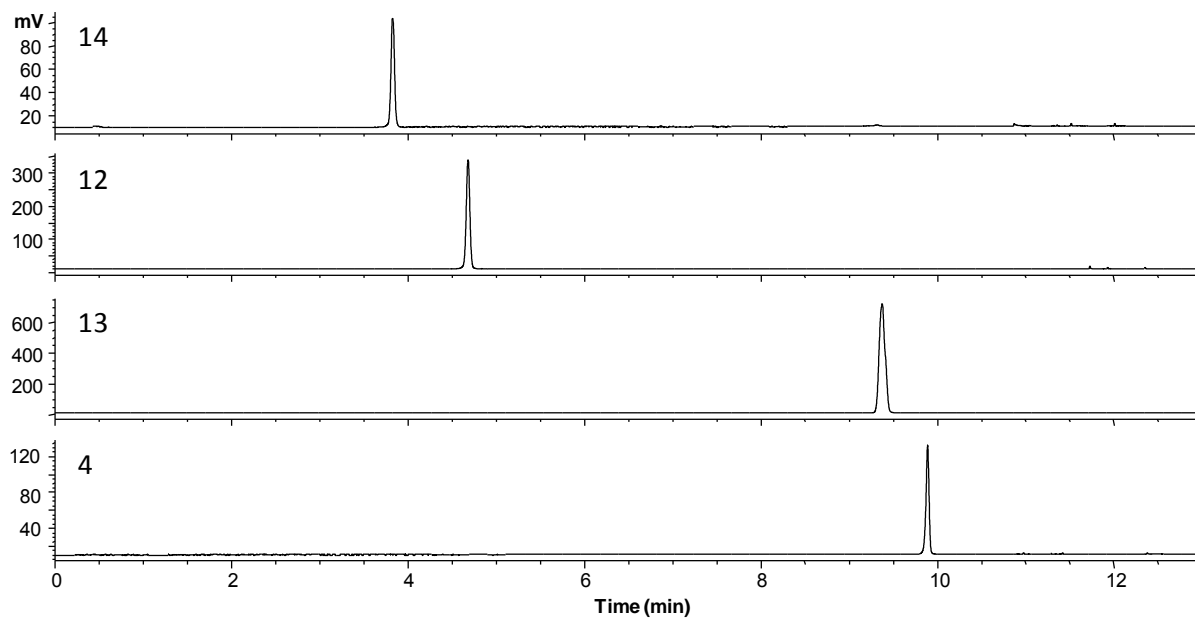

Supplement: NIHMS343911-supplement-Supplementary_Information.pdf [file NIHMS343911-supplement-Supplementary_Information.pdf]
